# Supplementary material for: A mixed-methods study of challenges and benefits of clinical academic careers for nurses, midwives and allied health professionals
Source: PubMed Central journal article supplement (PMC6797317; doi:10.1136/bmjopen-2019-030595), 2019-10-07
Supplement: bmjopen-2019-030595.draft_revisions.pdf [file bmjopen-2019-030595.draft_revisions.pdf]

# BMJ Open

BMJ Open is committed to open peer review. As part of this commitment we make the peer review history of every article we publish publicly available.

When an article is published we post the peer reviewers' comments and the authors' responses online. We also post the versions of the paper that were used during peer review. These are the versions that the peer review comments apply to.

The versions of the paper that follow are the versions that were submitted during the peer review process. They are not the versions of record or the final published versions. They should not be cited or distributed as the published version of this manuscript.

BMJ Open is an open access journal and the full, final, typeset and author-corrected version of record of the manuscript is available on our site with no access controls, subscription charges or pay-per-view fees (<http://bmjopen.bmj.com>).

If you have any questions on BMJ Open's open peer review process please email [info.bmjopen@bmj.com](mailto:info.bmjopen@bmj.com)

# BMJ Open

## **A mixed-methods study of challenges and benefits of clinical academic careers for nurses, midwives and allied health professionals**

|                               |                                                                                                                                                                                                                                                                                                              |
|-------------------------------|--------------------------------------------------------------------------------------------------------------------------------------------------------------------------------------------------------------------------------------------------------------------------------------------------------------|
| Journal:                      | <i>BMJ Open</i>                                                                                                                                                                                                                                                                                              |
| Manuscript ID                 | bmjopen-2019-030595                                                                                                                                                                                                                                                                                          |
| Article Type:                 | Research                                                                                                                                                                                                                                                                                                     |
| Date Submitted by the Author: | 28-Mar-2019                                                                                                                                                                                                                                                                                                  |
| Complete List of Authors:     | Trusson, Diane; University of Nottingham, School of Medicine<br>Rowley, Emma; University of Nottingham, Business School<br>Bramley, Louise; Nottingham University Hospitals NHS Trust, Institute of Nursing and Midwifery Care Excellence; University of Nottingham Faculty of Medicine and Health Sciences, |
| Keywords:                     | Clinical Academic careers, Nurses, midwives and AHPs, Mixed methods, Interviews                                                                                                                                                                                                                              |
|                               |                                                                                                                                                                                                                                                                                                              |

SCHOLARONE™  
Manuscripts

1  
2  
3 A mixed-methods study of challenges and benefits of clinical  
4 academic careers for nurses, midwives and allied health  
5 professionals  
6  
7  
8  
9

10 Authors: Diane Trusson, Emma Rowley, Louise Bramley  
11  
12

13 Correspondence address: Dr Diane Trusson, NIHR Collaboration for  
14 Leadership in Applied Health Research and Care (CLAHRC) East Midlands,  
15 Institute of Mental Health, University of Nottingham Innovation Park,  
16 Triumph Road, Nottingham, NG7 2TU. [Diane.Trusson@nottingham.ac.uk](mailto:Diane.Trusson@nottingham.ac.uk)  
17  
18  
19  
20  
21  
22

23 Phone: 0115 7484249  
24  
25

26 **Diane Trusson PhD:** Research Fellow NIHR CLAHRC East Midlands  
27  
28 (corresponding author); University of Nottingham School of Medicine,  
29 Nottingham, UK. Orcid ID: 0000-0002-6995-1192  
30  
31  
32

33  
34 **Emma Rowley PhD:** Capacity Development (Training Lead) NIHR  
35 CLAHRC East Midlands; Nottingham University Business School,  
36 Nottingham, UK. Orcid ID: 0000-0002-6668-1350  
37  
38  
39  
40  
41

42 **Louise Bramley RN PhD:** Clinical Lead Research and Innovation,  
43 Institute of Nursing and Midwifery Care Excellence, Nottingham University  
44 Hospitals NHS trust, Nottingham, UK. Orcid ID: 0000-0002-0425-1734  
45  
46  
47  
48  
49  
50

51 **Key words:** Clinical Academic careers; Nurses, midwives and AHPs;  
52 Mixed methods; Interviews  
53  
54  
55

56  
57 **Word count:** 3,999  
58  
59  
60

## ABSTRACT

**Objectives:** The clinical academic trajectory for doctors and dentists is well-established, with research embedded in their career development. Recent years have also seen a burgeoning interest and push for nurses, midwives and allied health professionals (NMAHPs) to pursue a clinical academic career. However, the NIHR 10 year review suggested that there may be problems with progression post Masters degree level for this group, with nurses and midwives receiving less NIHR funding than AHPs. This study responds to these concerns, tracking the progression and exploring experiences of NMAHPs in the East Midlands region of England.

**Design:** An online survey and in-depth interviews were used to capture a wide range of experiences.

**Participants:** 67 NMAHPs who were pursuing a clinical academic career were surveyed, supplemented by 16 semi-structured in-depth interviews.

**Results:** Three themes emerged during data analysis: Coming to a clinical academic career; barriers; and benefits.

**Conclusions:** NMAHPs are motivated to pursue a clinical academic career not only for personal development and career progression, but also a drive to improve services for the benefit of patients and the NHS as a whole. People working in these roles have opportunities to explore possible solutions to issues that they encounter in their clinical role through academic study. Findings reveal benefits emanating from the

1  
2  
3 individual level through to (inter)national levels, therefore academic study  
4  
5 should be encouraged and supported. However, investment is needed to  
6  
7 establish more clinical academic roles to enable NMAHPs to continue to  
8  
9 utilise their experience and expertise post-PhD, otherwise the full extent  
10  
11 of their value will not be recognised.  
12  
13  
14  
15

## 16 **ARTICLE SUMMARY**

### 17 **STRENGTHS AND LIMITATIONS OF THIS STUDY –**

- 22 • Online survey gathered the views of 67 respondents outside of  
23 medicine and dentistry, representing a wide range of occupations  
24 and academic achievements.  
25  
26
- 27 • In-depth interviews with 16 respondents enabled exploration of  
28 issues around career progression and impact resulting from  
29 academic study.  
30  
31
- 32 • The study was limited geographically to one area of the UK.  
33  
34  
35  
36  
37  
38  
39  
40  
41

## 42 **INTRODUCTION**

### 43 **Background**

44  
45  
46  
47  
48  
49  
50  
51  
52  
53 There is a long tradition of doctors and dentists pursuing academic  
54  
55 research alongside their clinical practice.<sup>1</sup> However, it is increasingly  
56  
57 acknowledged that nurses, midwives and allied health professionals  
58  
59  
60

1  
2  
3 (AHPs) (henceforth NMAHPs) are also well-placed to devise solutions to  
4  
5 the problems that they observe first hand in their day-to-day clinical  
6  
7 practice.<sup>2</sup> A research-active workforce is important to the NHS, which  
8  
9 aims to 'build the capacity and capability of our current and future  
10  
11 workforce to embrace and actively engage with research and  
12  
13 innovation'.<sup>3,p.6</sup> Furthermore, 'the NHS supports and harnesses the best  
14  
15 research and innovations to improve patient outcomes, transform services  
16  
17 and ensure value for money'.<sup>4,p.4</sup> Health Education England (HEE) and the  
18  
19 National Institute of Health and Social Care Research (NIHR) have  
20  
21 developed schemes to encourage NMAHPs to pursue postgraduate study  
22  
23 in partnerships with the NHS and Higher Education Institutions (HEIs)  
24  
25 across the UK, giving them 'the chance to bring their questioning minds,  
26  
27 and expertise, to the research table'.<sup>2,p.2</sup>

28  
29 However, in its 10 year report, the NIHR expressed concerns about the  
30  
31 'poor academic progression for non-medical professions from the Masters  
32  
33 level',<sup>5,p.2</sup> particularly for nurses and midwives. This contrasts heavily with  
34  
35 anecdotal evidence in the East Midlands area of England which suggests  
36  
37 good levels of progression achieved by NMAHPs. Previous studies have  
38  
39 explored the experiences of doctors and dentists embarking on a clinical  
40  
41 academic career,<sup>6,7</sup> yet there is a gap in understanding about the  
42  
43 experiences of NMAHPs. The first practitioner network for clinical  
44  
45 academics<sup>8</sup> (a joint innovation between NIHR CLAHRC East Midlands and  
46  
47 Nottingham University Hospitals NHS Trust), offered an opportunity to  
48  
49 close this gap.  
50  
51  
52  
53  
54  
55  
56  
57  
58  
59  
60

1  
2  
3 The study aimed to track progression of clinical academic NMAHPs in the  
4 East Midlands; to explore challenges in combining academic study with  
5 clinical practice; and to demonstrate the impact on patient outcomes and  
6 value of investing in clinical academic careers for NMAHPs.  
7  
8  
9  
10  
11  
12

## 13 **METHODS**

### 14 **Study design**

15  
16  
17  
18  
19  
20 The study had two data-gathering components. In the first stage, a  
21 Bristol Online Survey<sup>9</sup> was created, aiming to:  
22  
23  
24

- 25 I. Track the progression of clinical academics across the pathway and
- 26 II. Explore the ways in which training programmes and clinical  
27 academic roles had impacted on the respondents' clinical practice.  
28  
29

30  
31  
32  
33  
34  
35  
36  
37  
38 The survey was open for a 2 month period. The second stage of the study  
39 involved 16 semi-structured, in-depth interviews.  
40  
41  
42

### 43 **Recruitment**

44  
45  
46  
47 A link to the online survey was sent to members of the East Midlands  
48 Clinical Academic Network<sup>9</sup> and was publicised through social media  
49 platforms.  
50  
51  
52

53  
54  
55  
56  
57  
58  
59  
60  
60 Most of the interviewees were self-selected having volunteered as part of  
the survey, while the rest were recruited through snowball sampling.

## Ethical considerations

Ethical clearance was not needed for this study because it explored experiences of a current provision, with participants recruited by virtue of their participation in educational programmes, rather than their NHS status. Nevertheless, good research governance was observed with participants assured of confidentiality and anonymity. All participants gave informed consent.

## Interview sample

| Case study | Clinical role | Stage of study (at interview) | PhD year | Age group | Gender |
|------------|---------------|-------------------------------|----------|-----------|--------|
| 1          | Nurse/midwife | Thesis pending                |          | 20-30     | Female |
| 2          | Nurse/midwife | PhD                           | 2        | 41-50     | Female |
| 3          | Nurse/midwife | PhD                           | 4        | 41-50     | Female |
| 4          | Nurse/midwife | Post-doc                      |          | 41-50     | Female |
| 5          | Nurse/midwife | PhD                           | 3        | 41-50     | Female |
| 6          | AHP           | PhD                           | 4        | 41-50     | Female |
| 7          | AHP           | PhD                           | 2        | 41-50     | Female |
| 8          | Nurse/midwife | PhD                           | 5        | 41-50     | Female |
| 9          | Nurse/midwife | Post-doc                      |          | 31-40     | Male   |
| 10         | AHP           | PhD                           | 2        | 41-50     | Female |
| 11         | AHP           | PhD                           | 1        | 41-50     | Female |
| 12         | AHP           | PhD                           | 4        | 51+       | Male   |
| 13         | AHP           | PhD                           | 3        | 31-40     | Male   |
| 14         | AHP           | PhD                           | 3        | 41-50     | Male   |
| 15         | AHP           | Post-doc                      |          | 51+       | Male   |
| 16         | AHP           | PhD                           | 1        | 31-40     | Male   |

Table 1. Interview sample characteristics

## Data analysis

Responses were collated and summarised using the Bristol Online Survey<sup>9</sup> software. Descriptive numerical data were represented in graphs and tables.



1  
2  
3 The interviews were digitally recorded and professionally transcribed  
4  
5 verbatim. Qualitative data from the free-text survey responses and the  
6  
7 interview transcripts were combined and analysed using thematic  
8  
9 analysis. This involved reading through the data to identify 'patterned  
10  
11 responses or meaning within the data set'.<sup>10, p.82</sup> Emerging themes were  
12  
13 discussed and agreed with the co-authors to assure quality.  
14  
15  
16  
17

## 18 **RESULTS**

### 19 **Respondents**

20  
21  
22 There were 81 responses to the online survey; however 14 responses  
23  
24 were excluded because they were not members of the East Midlands  
25  
26 Clinical Practitioner Network. This is a limitation of using social media to  
27  
28 publicise the survey.  
29  
30  
31  
32  
33

34  
35 The following sections report the findings from a combination of survey  
36  
37 and interview data with a particular focus on the academic pathway.  
38

39  
40 Three major themes are discussed: coming to the clinical academic  
41  
42 career; overcoming barriers; and benefits of clinical academic research.  
43

44  
45 Within this discussion are issues around funding, management support,  
46  
47 impact, and encouraging future clinical academic leaders. Participants are  
48  
49 identified by their interview case study (CS) or survey respondent (SR)  
50  
51 number and professional group only, to preserve anonymity.  
52  
53  
54

### 55 *Gender*

56  
57  
58 *Figure 1. How participants described their gender*  
59  
60

1  
2  
3  
4  
5  
6 The gender split of participants was expected, due to the predominantly  
7 'female gendered' occupations being questioned. For example, the  
8 majority of nurses (who outnumber AHPs considerably) and midwives,  
9 identify as female.<sup>11</sup>  
10  
11  
12  
13  
14  
15

## 16 *Age*

17  
18  
19 *Figure 2. Survey respondents' age groups*

20  
21 Despite the HEE aim of producing future clinical academic leaders early in  
22 their career,<sup>3</sup> results illustrate that funding is currently being used to  
23 support mid/late careers. Consequently, there may be potential  
24 implications for the career level and impact NMAHPs are able to achieve  
25 before retirement. This contrasts to the rhetoric of investing in future  
26 leaders, while also suggesting that 'the potential of high-achieving  
27 graduates is underexploited'<sup>12,p.8</sup> as participants were waiting some years  
28 post-undergraduate award, to pursue clinical academic ambitions.  
29  
30  
31  
32  
33  
34  
35  
36  
37  
38  
39

40  
41 The current culture within the clinical setting was described as a particular  
42 barrier for clinical academic progression by participants in the 20-30 year  
43 age bracket:  
44  
45  
46  
47  
48

49 I have come across lots of negativity in pursuing a clinical academic  
50 career as a nurse who is only a few years qualified (SR13  
51 nurse/midwife).  
52  
53  
54  
55  
56

57 They think to be an expert in your field you must've been qualified  
58 for like fifteen plus years. Well that's just ridiculous because I know  
59  
60

1  
2  
3 a lot more than some colleagues who've been working double the  
4  
5 amount of time that I have and that's just because I like to  
6  
7 understand why I'm doing what I'm doing (CS1 nurse/midwife).  
8  
9

10  
11 This indicates a need for a culture change so that NMAHPs are supported  
12  
13 to join the clinical academic career trajectory at an earlier stage, for  
14  
15 instance through the apprenticeship model.<sup>13</sup> It seems that in some  
16  
17 cases, individuals are expected to have a number of years' experience  
18  
19 and a secure clinical role before they are supported to embark on the  
20  
21 clinical academic pathway, rather than being able to have parallel roles  
22  
23 like their medical colleagues.  
24  
25  
26  
27

## 28 29 **Coming to the clinical academic career**

### 30 31 *Motivation*

32  
33 In contrast to doctors and dentists, research has not traditionally been a  
34  
35 career route for NMAHPs. Participants described being self-motivated to  
36  
37 pursue research, rather than follow a pre-defined path:  
38  
39  
40

41  
42 I've always, from very early on in my clinical career, had an interest  
43  
44 in evidencing the work that I was doing. So I self-motivated really,  
45  
46 did service audits and evaluations (CS14 AHP).  
47  
48  
49

50  
51 Participants often considered leadership of other people in their decision  
52  
53 to pursue academic study:  
54  
55

56  
57 I want to do this for me, but I also want to do it for my daughters  
58  
59 to show that women can be in science and can lead in these fields  
60

1  
2  
3 and yes we might have to juggle family things and children, but  
4  
5 you can do it (CS7 AHP).  
6  
7

8  
9 It's essential for me to have a PhD because we need people to  
10  
11 mentor, to supervise. I need to be at that level for the staff coming  
12  
13 through, to help them (CS8 nurse/midwife).  
14  
15

16  
17 As well as wanting to improve their (and others') prospects, participants  
18  
19 were also driven to improve patient care:  
20  
21

22  
23 Clinical academics are part of the solution. We can innovate and  
24  
25 generate the solutions for these age-old problems that we're  
26  
27 seeing, having a robust methodological approach to understanding  
28  
29 and exploring the phenomena. But also developing and testing  
30  
31 interventions to address these problems (CS9 nurse/midwife).  
32  
33  
34

35  
36 This illustrates the potential value of investing in clinical academic careers  
37  
38 for NMAHPs who can move change from an idea into a tested intervention  
39  
40 within their clinical practice. Having doctoral training and following a clinical  
41  
42 academic career was also about leadership opportunities and potential, as  
43  
44 well as building a culture within the NMAHP professions so that many others  
45  
46 could follow the path started by the few.  
47  
48  
49

## 50 51 **Overcoming barriers** 52 53

### 54 55 56 57 *Seeking funding* 58 59 60

1  
2  
3 Unless they successfully secured a highly competitive and prestigious  
4 fellowship such as the NIHR Clinical Research Doctoral Fellowship, PhD  
5 students were likely to be offered standard UK Research and Innovation  
6 stipends (approx. £14.5K per year)<sup>14</sup> compared to the £40K+per year  
7 salaries for a senior band 7/8 practitioner.<sup>15</sup> This was problematic for  
8 participants who had often reached high pay bands by the time they  
9 embarked on an academic pathway; it also meant they faced tricky  
10 decisions and negotiations about pension and employment rights:  
11  
12  
13  
14  
15  
16  
17  
18  
19  
20  
21  
22

23  
24 Clearly I think an obstacle is when you get to that high clinical  
25 level and you've got mortgages and things, it makes it very  
26 difficult to do it on a basic stipend (CS14 AHP).  
27  
28  
29  
30

31  
32 This limited the type of award that participants applied for:  
33  
34

35  
36 With a mortgage, a baby, one on the way it was only an NIHR  
37 fellowship... it was that or nothing (CS13 AHP).  
38  
39

40  
41 I'm the main breadwinner, I earn more than my husband ... so that  
42 financial part was a big barrier for me. I knew that the best financial  
43 support were the NIHR ones, so I took that time to develop that  
44 application. It didn't just affect me, it would affect the whole family  
45 (CS7 AHP).  
46  
47  
48  
49  
50  
51  
52

53  
54 Some participants had received financial support from their employer  
55 which enabled them to make the move into academic study:  
56  
57  
58  
59  
60

1  
2  
3 My employers said that if I applied for a stipend and was successful  
4 they would top me up to my full salary which would allow me to do  
5  
6 it essentially full-time (CS14 AHP).  
7  
8  
9

10  
11 However, this experience was not the norm; rather, NMAHPs were being  
12  
13 forced to make sacrifices in order to develop their career portfolio and  
14  
15 skills.  
16  
17

### 18 19 *Maintaining a clinical role*

20  
21  
22 The NIHR's guide to the Integrated Clinical Academic Programme  
23 describes how 'the individual's academic and clinical 'jobs' are not  
24 mutually exclusive but are instead complementary, informing and  
25 supporting each other, and definable within a single role'.<sup>16,p6</sup> Participants  
26 described the benefits of working in their clinical setting:  
27  
28  
29  
30  
31  
32  
33

34  
35 When I was on the ward I could kind of forget about the PhD but  
36 also recognise how it was shaping me as a nurse. (CS1  
37 nurse/midwife).  
38  
39  
40  
41  
42

43 However, working at the same time as doing a PhD was identified as  
44  
45 challenging:  
46  
47

48  
49 If you haven't finished [the PhD] and come back to practice and you  
50 get a promotion, you're in deep shit because the promotion is  
51 massive and the PhD is hugely important. You've got to somehow  
52 survive with the work and academia all at once and not fall down  
53  
54  
55  
56  
57  
58  
59  
60

1  
2  
3 the rabbit hole and get lost. Yeah that's a big challenge (CS8  
4  
5 nurse/midwife).  
6  
7

8  
9 Recognising this challenge, the Council of Deans of Health recommend  
10  
11 'support from the clinical side including agreed study time'<sup>12,p.9</sup> for clinical  
12  
13 academics. However, a recurring theme in the data was that managers  
14  
15 were unwilling, or unable, to release staff to do research:  
16  
17

18  
19 You have to get your line manager to sign the application form to  
20  
21 say they'll support you and it took a lot of effort to get that signed.  
22  
23 They only gave in because my contract was 22½ hours a week.  
24  
25 They said "what you do in the rest of the time is your own business,  
26  
27 but it can't impact on this, we're not giving you any time off". It  
28  
29 was "what's this got to do with your job"? (CS5 nurse/midwife).  
30  
31  
32  
33  
34  
35

36 A common, potentially problematic issue encountered by the respondents  
37  
38 was an apparent lack of recognition of the value of research:  
39  
40

41  
42 There's a huge untapped workforce...with the right support and time  
43  
44 we could be doing things more effectively and more efficiently, but  
45  
46 that isn't necessarily valued in organisations. We've got to see this  
47  
48 many patients, [we're] not using our skills of criticality, reflectivity;  
49  
50 we're not going to innovate and change practice (CS7 AHP).  
51  
52  
53

54 Despite their achievements during the PhD, many participants expressed  
55  
56 anxieties about their future careers, having been made to move aside  
57  
58 clinically in order to progress their academic ambitions, rather than being  
59  
60

1  
2  
3 able to develop their academic and clinical skills in tandem. For example a  
4  
5 dietician said:

6  
7  
8  
9 Recently I've had to step out of my area of expertise... I'm just doing  
10  
11 general, allergies, weight management, which is not my area, but I  
12  
13 need to pay the mortgage (CS10 AHP).  
14  
15  
16

17 This indicates a serious lack of organisational and professional value  
18  
19 placed on the knowledge and skills achieved by some clinical academics.  
20  
21 As a result, some participants felt there might be no option to stay in their  
22  
23 clinical role post-PhD:  
24  
25

26  
27 I would be keen to stay more NHS-based but constraints with  
28  
29 funding and time might end up pushing quite a few of us out into  
30  
31 university (CS2 nurse/midwife).  
32  
33  
34

35 I currently work for an NHS trust, but the lack of support makes me  
36  
37 wonder if the only option is to not work clinically, or work  
38  
39 bank/agency, which to me is not embracing the value clinical  
40  
41 academics can bring to the clinical area (CS13 nurse/midwife).  
42  
43  
44

45  
46 In contrast to the clear career trajectory for doctors and dentists, 'early  
47  
48 career clinical academics face uncertain career paths and may choose the  
49  
50 comparably stable worlds of clinical practice where their skills are in high  
51  
52 demand, or a dedicated academic career.'<sup>3,p.9</sup> The main reason being; 'the  
53  
54 scarcity and highly competitive nature of NMAHP postdoctoral research  
55  
56  
57  
58  
59  
60



1  
2  
3 positions (...) and the comparative lack of research funding for healthcare  
4  
5 professions other than medicine<sup>3,p.9</sup> as this participant articulated:

6  
7  
8  
9 My frustration [is that] the pathway is a pyramid therefore some  
10  
11 people will not progress up (CS12 AHP).

12  
13  
14  
15 The participants who had successfully negotiated this 'pyramid' were aware  
16  
17 of the uniqueness of their position:

18  
19  
20 I have a very supportive divisional head nurse and have been  
21  
22 appointed into a trailblazer post; we haven't got anything similar  
23  
24 within the organisation. So there's real potential to forge out  
25  
26 innovative ways in which clinical academics can fulfil that remit of  
27  
28 working in clinical practice and undertaking research, but also pave  
29  
30 the way for others that want to come up (CS9 nurse/midwife).

31  
32  
33  
34  
35  
36 Similarly, the chief medical officer argues that 'developing the next  
37  
38 generation of research leaders in clinical research is essential to the  
39  
40 UK'<sup>15,p.502</sup> but the data suggest a cliff-edge in the pathway; greater  
41  
42 numbers of practitioners are embarking on clinical academic careers, but  
43  
44 following PhD, opportunities are scarce. The fortunate have the  
45  
46 organisational backing to 'trail-blaze', but others face a decision to return  
47  
48 to their pre-PhD clinical role (and hence not have their academic skills  
49  
50 recognised and utilised) or follow a traditional academic research pathway  
51  
52 and leave their clinical post behind (thus negating the whole reason for  
53  
54 pursuing a clinical academic career).

## Benefits and impact

The data revealed multiple levels of impact and the value of academic research as the ecological model<sup>18</sup> below illustrates:

*Figure 3. Ecological model*

### *Individual level*

Participants reported benefits such as job satisfaction, increased awareness of research, enhanced skills and sense of achievement. The clinical academic pathway had also presented opportunities for progression. One participant had been 'talent-spotted' and offered 'numerous extra employment and development opportunities'. Other participants had made huge advances in their careers, with one becoming a consultant midwife, and another achieving a clinical lectureship (a pivotal post in the NIHR funded clinical academic trajectory).

### *Patients and their carers*

The research undertaken by the participants could potentially make a big difference to patient outcomes and experiences. For example, an AHP had identified an element of practice that could extend and improve the lives of seriously ill children. Another participant had introduced a pre-surgery exercise programme which helped patients to feel involved in the process and was highly rated in a patient satisfaction survey.

1  
2  
3 These examples illustrate how NMAHPs on a clinical academic pathway  
4 are uniquely placed to develop interventions which can be easily  
5  
6 implemented with positive results for patient care.  
7  
8  
9

### 10 11 *Peers/colleagues* 12

13  
14  
15 Many participants described their pride at becoming role models, able to  
16 support other colleagues into academic study:  
17  
18  
19

20  
21 I've mentored a lot of different kinds of professions to actually  
22 realise that it is doable. That's a really rewarding side to the job to  
23 think that you might have helped somebody [to] be a more able  
24 clinician, a more able academic which can then impact on the  
25 patient (CS7 AHP).  
26  
27  
28  
29  
30  
31  
32  
33

34 This demonstrates the important role of mentors in encouraging future  
35 clinical leaders by providing 'pastoral support and help[ing] mentees deal  
36 with the demands of a clinical academic research career.'<sup>12,p.10</sup> It also  
37 reveals the value of investing in staff who then give back.  
38  
39  
40  
41  
42  
43  
44

### 45 *NHS Trust* 46 47 48 49

50 Recognising that research intensive organisations have better patient  
51 outcomes, the Care Quality Commission have introduced research into its  
52 quality framework.<sup>19</sup> Respondents described numerous benefits for the  
53 NHS organisations who supported clinical academic careers. For example:  
54  
55  
56  
57  
58  
59  
60

1  
2  
3 At the hospital they want this Magnet status.<sup>20</sup> The three domains  
4 are good clinical outcomes; patient experience; and staff experience  
5 and part of [that] is having well qualified nurses. They really want  
6 to increase the academic underpinnings of nurses and have research  
7 leaders...what I'm doing really ticks the boxes of Magnet (CS5  
8 nurse/midwife).  
9  
10  
11  
12  
13  
14  
15  
16

17  
18  
19 Participants highlighted how supporting clinical academic careers could  
20 address current issues with recruitment and retention:  
21  
22

23  
24 Forty thousand nurses we have a national deficit of, so people can  
25 choose where they want to work. They'll be looking for  
26 organisations that are aspirational. So actually offering innovative  
27 career pathways that can intellectually challenge, but also have that  
28 direct patient care element, is going to be attractive to a lot of  
29 people (CS9 nurse/midwife).  
30  
31  
32  
33  
34  
35  
36  
37  
38  
39

40 These comments resonate with the NIHR's advice for aspiring clinical  
41 academics 'to base themselves within organisations where the importance  
42 of research is well understood and clinical academic careers are  
43 appropriately supported.'<sup>16,p.6</sup>  
44  
45  
46  
47  
48  
49

50 The data revealed numerous examples of impact resulting from  
51 participants' clinical academic careers, including the potential for  
52 substantial savings. For example, one participant's intervention removes  
53 the need for GPs' referral for physiotherapy, potentially saving  
54 'multimillion pounds' across the NHS, and has subsequently been  
55  
56  
57  
58  
59  
60

1  
2  
3 recognised in the NHS long-term plan.<sup>21</sup> This illustrates how clinical  
4 academics can develop 'well informed and relevant research'<sup>4,p.5</sup> that can  
5  
6 quickly be transferred into practice for the benefit of the NHS.  
7  
8  
9

### 10 *Inter(national)*

11  
12  
13  
14  
15

16 Participants provided details of multiple academic journal articles and  
17 conference presentations enabling worldwide dissemination of their  
18 research. In addition, one participant was invited to join an International  
19 Working Party developing consensus guidelines for treating children with  
20 kidney disease.  
21  
22  
23  
24  
25  
26  
27  
28

29 In another example, an open-access resource to help professionals to deal  
30 with children in mental health crises, specifically those at risk from self-  
31 harm, had been 'disseminated nationally, not just within health, but also  
32 in social care and education settings'. This illustrates the wide-ranging  
33 impact of clinical academics' research which can occur more speedily than  
34 traditional research.  
35  
36  
37  
38  
39  
40  
41  
42  
43

44 These reported experiences represent a small snapshot of the benefits of  
45 supporting NMAHPs to pursue clinical academic careers and the need to  
46 do so, as one participant articulated:  
47  
48  
49  
50  
51

52  
53 Moving forward we have to look at more sustainable and integrated  
54 approaches to embedding clinical academic careers. I'm excited to  
55 hear that there's an apprenticeship framework coming out because  
56  
57  
58  
59  
60

1  
2  
3 for clinical academic careers to be truly embedded within non-  
4  
5 medical professional career pathways, it has to be driven by the  
6  
7 NHS. Universities get the value of clinical academics and they're on  
8  
9 board, but for it to truly work, we need to have change within the  
10  
11 NHS (CS9 nurse/midwife).  
12  
13  
14  
15  
16  
17  
18  
19

## 20 **DISCUSSION**

21  
22  
23  
24  
25 This study has explored the experiences of NMAHPs in the context of the  
26  
27 NIHR 10 year report which expressed concern about the 'poor academic  
28  
29 progression for non-medical professions from the Masters level'.<sup>5,p.2</sup> The  
30  
31 data reveal that NMAHPs do progress; albeit through alternative means  
32  
33 than the NIHR pathway. For example, 11 respondents who had  
34  
35 progressed from the NIHR funded Masters in Research Methods had  
36  
37 funding from other sources including Collaborations for Leadership in  
38  
39 Applied Health Research and Care (CLAHRC), Economic and Social  
40  
41 Research Council (ESRC), charities and university funding. However,  
42  
43 according to the NIHR metrics, these individuals have not progressed  
44  
45 their clinical academic careers. In addition, the findings indicate good  
46  
47 levels of career progression post-PhD, including consultant midwife and  
48  
49 clinical lectureship roles, and far-reaching impact of research. Success  
50  
51 was achieved despite barriers such as a lack of support for NMAHPs  
52  
53 wanting to pursue this path. This suggests a need for a change of culture  
54  
55  
56  
57  
58  
59  
60

1  
2  
3 in line with NHS recommendations for a research-active workforce,  
4  
5 especially in under-represented roles such as nurses and midwives.  
6  
7

8  
9 The mixed methods used in this study enabled data collection from a wide  
10  
11 range of health professionals, providing an overview of NMAHPs'  
12  
13 experiences of embarking on a clinical academic pathway. Although  
14  
15 limited in number and by geographical location, the data provide useful  
16  
17 insights into the experiences of this under-researched group.  
18  
19

20  
21 The study demonstrates the multi-level value of investing in NMAHPs  
22  
23 whose innovative research is focussed on finding the best solutions to  
24  
25 meet patients' needs, with potential cost-benefits for the NHS.  
26  
27

28 Encouraging a research-active workforce is also important for recruitment  
29  
30 and retention of talented staff.  
31  
32

33  
34 NMAHPs are committed to conducting high-quality research alongside  
35  
36 their clinical role. However, pursuing a clinical academic pathway was  
37  
38 likened to a pyramid where progression becomes increasingly challenging.  
39  
40 In contrast to their medical colleagues, many participants undertaking  
41  
42 PhDs were faced with the prospect of having no job to return to, or taking  
43  
44 pay cuts or reduced hours. Consequently, some participants were  
45  
46 considering a purely academic career with a resultant loss of expertise for  
47  
48 the NHS. The findings indicate an urgent need for a clear clinical  
49  
50 academic pathway to be developed for NMAHPs post-PhD. As the Council  
51  
52 of Deans of Health point out, 'a PhD is the 'end of the beginning' of  
53  
54 research training rather than an end in itself.'<sup>12,p.10</sup>  
55  
56  
57  
58  
59  
60

## CONCLUSION

This study shows how investing in training for NMAHPs is vital in developing and retaining a research-active workforce where patient care remains the central consideration. Ensuring a clear academic career path will ensure that expertise and experience continue to be utilised fully for the benefit of patients and the NHS as a whole.

## REFERENCES

1. Westwood G, Richardson A, Latter S, et al. Building clinical academic leadership capacity: sustainability through partnership. *Journal of Research in Nursing*, 2018;23(4)346-357.
2. Trueland J. Birth of a new breed. *Health Service Journal supplement* 2015; <https://www.hsj.co.uk/Uploads/y/r/i/Research--Impact-supplement-18th-Nov-2015.pdf> accessed 13/2/2019
3. Health Education England <https://www.hee.nhs.uk/sites/default/files/documents/HEE%20research%20and%20innovation%20strategy.pdf> accessed 18/2/2019
4. NHS England research plan <https://www.england.nhs.uk/wp-content/uploads/2017/04/nhse-research-plan.pdf>
5. NIHR Trainees Coordinating Centre <https://www.nihr.ac.uk/our-research-community/documents/TCC-NIHR-Strategic-Review-of-Training-2017.pdf>



- 1  
2  
3 6. Funston G, Cerra C, Kirkham D, et al. The road to a clinical academic  
4  
5 career. *BMJ* 2015;350:h786  
6  
7
- 8  
9 7. Lopes J, Ranieri V, Lambert T, et al. The clinical academic workforce of  
10  
11 the future: a cross-sectional study of factors influencing career decision-  
12  
13 making among clinical PhD students at two research-intensive UK  
14  
15 universities. *BMJ Open* 2017;7.8:e016823.  
16  
17
- 18  
19 8. East Midlands Clinical Academic Practitioner Network  
20  
21 [http://www.clahrc-em.nihr.ac.uk/about/east-midlands-clinical-academic-  
24  
25 practitioner-network](http://www.clahrc-em.nihr.ac.uk/about/east-midlands-clinical-academic-<br/>22<br/>23 practitioner-network)  
26
- 27 9. Bristol Online Survey <https://www.onlinesurveys.ac.uk>  
28  
29
- 30 10. Braun V, Clarke V. Using thematic analysis in psychology. *Qualitative*  
31  
32 *research in psychology* 2006;3(2):77-101.  
33  
34
- 35 11. Nursing and Midwifery Council. The NMC register 2018:  
36  
37 [https://www.nmc.org.uk/globalassets/sitedocuments/other-  
40  
41 publications/nmc-big-picture-september-18.pdf](https://www.nmc.org.uk/globalassets/sitedocuments/other-<br/>38<br/>39 publications/nmc-big-picture-september-18.pdf) accessed 22/1/2019  
42  
43
- 44 12. Baltruks D, Callaghan P. [https://councilofdeans.org.uk/wp-  
49  
50 academic-research-careers-in-the-UK.pdf](https://councilofdeans.org.uk/wp-<br/>45<br/>46 content/uploads/2018/08/Nursing-midwifery-and-allied-health-clinical-<br/>47<br/>48 academic-research-careers-in-the-UK.pdf) Accessed 18/2/2019  
51  
52
- 53 13. [https://www.healthcareers.nhs.uk/career-planning/study-and-  
56  
57 Training/apprenticeships-traineeships-and-cadet-schemes](https://www.healthcareers.nhs.uk/career-planning/study-and-<br/>54<br/>55 Training/apprenticeships-traineeships-and-cadet-schemes)  
58  
59
- 60 14. [https://mrc.ukri.org/skills-careers/studentships/studentship-  
guidance/minimum-stipend-and-allowances/](https://mrc.ukri.org/skills-careers/studentships/studentship-<br/>guidance/minimum-stipend-and-allowances/) Accessed 18/2/2019

1  
2  
3 15. NHS Agenda for change [https://www.healthcareers.nhs.uk/working-](https://www.healthcareers.nhs.uk/working-health/working-nhs/nhs-pay-and-benefits/agenda-change-pay-rates)  
4 [health/working-nhs/nhs-pay-and-benefits/agenda-change-pay-rates](https://www.healthcareers.nhs.uk/working-health/working-nhs/nhs-pay-and-benefits/agenda-change-pay-rates)  
5  
6

7  
8 Accessed 8/1/2019  
9

10  
11 16. NHS Health Education England and National Institute for Health  
12  
13 Research 2017; [https://www.nihr.ac.uk/funding-and-](https://www.nihr.ac.uk/funding-and-support/documents/ICA/TCC-ICA-GUIDE.pdf)  
14 [support/documents/ICA/TCC-ICA-GUIDE.pdf](https://www.nihr.ac.uk/funding-and-support/documents/ICA/TCC-ICA-GUIDE.pdf) accessed 16/1/2019  
15  
16

17  
18 17. Davies SC, Walley T, Smye S, et al. The NIHR at 10: transforming  
19  
20 clinical research. *Clinical Medicine* 2015;16(6):501-210.  
21  
22

23  
24 <http://www.clinmed.rcpjournal.org/content/16/6/501.full.pdf+html>  
25  
26

27 18. Bronfenbrenner U, 1979. *The ecology of human development*.  
28  
29 Harvard university press.  
30

31  
32 19. NIHR [https://www.nihr.ac.uk/news/partners-announce-latest-](https://www.nihr.ac.uk/news/partners-announce-latest-progress-with-cqc-aimed-at-ensuring-research-is-a-priority-for-quality-patient-care/8496ere)  
33 [progress-with-cqc-aimed-at-ensuring-research-is-a-priority-for-quality-](https://www.nihr.ac.uk/news/partners-announce-latest-progress-with-cqc-aimed-at-ensuring-research-is-a-priority-for-quality-patient-care/8496ere)  
34 [patient-care/8496ere](https://www.nihr.ac.uk/news/partners-announce-latest-progress-with-cqc-aimed-at-ensuring-research-is-a-priority-for-quality-patient-care/8496ere)  
35  
36  
37

38  
39 20. <https://www.nursingworld.org/organizational-programs/magnet/>  
40  
41  
42 accessed 4/1/2019  
43  
44

45  
46 21. NHS [https://www.longtermplan.nhs.uk/wp-](https://www.longtermplan.nhs.uk/wp-content/uploads/2019/01/nhs-long-term-plan.pdf)  
47 [content/uploads/2019/01/nhs-long-term-plan.pdf](https://www.longtermplan.nhs.uk/wp-content/uploads/2019/01/nhs-long-term-plan.pdf) accessed 18/3/2019  
48  
49

50  
51 **Figures:**  
52

- 53  
54  
55  
56  
57  
58  
59  
60
- Figure 1. How participants described their gender
  - Figure 2. Age groups of survey respondents
  - Figure 3. Ecological model

1  
2  
3 **Author Contributions:** All authors were involved with the study design,  
4 data analysis and preparing this paper. The first author conducted all  
5 interviews.  
6  
7  
8  
9

10  
11 **Funding:** This work was supported by the National Institute for Health  
12 Research (NIHR) Collaboration for Leadership in Applied Health Research  
13 and Care East Midlands (CLAHRC EM), grant number S-CLA-0113-10014.  
14 The views expressed are those of the authors and not necessarily those of  
15 the NIHR or the Department of Health and Social Care.  
16  
17  
18  
19  
20  
21  
22

23  
24 **Competing interests:** All authors have completed the ICMJE uniform  
25 disclosure form at [www.icmje.org/coi\\_disclosure.pdf](http://www.icmje.org/coi_disclosure.pdf) and declare: all  
26 authors had financial support from the National Institute for Health  
27 Research (NIHR) Collaboration for Leadership in Applied Health Research  
28 and Care East Midlands (CLAHRC EM) for the submitted work; no financial  
29 relationships with any organisations that might have an interest in the  
30 submitted work in the previous three years; no other relationships or  
31 activities that could appear to have influenced the submitted work.  
32  
33  
34  
35  
36  
37  
38  
39  
40  
41  
42  
43

44 **Patient and public involvement:** We did not involve patients or the  
45 public in our work.  
46  
47  
48

49 **Data sharing statement:** Raw transcripts are held by the authors who  
50 will consider requests for further information.  
51  
52  
53  
54  
55  
56  
57  
58  
59  
60

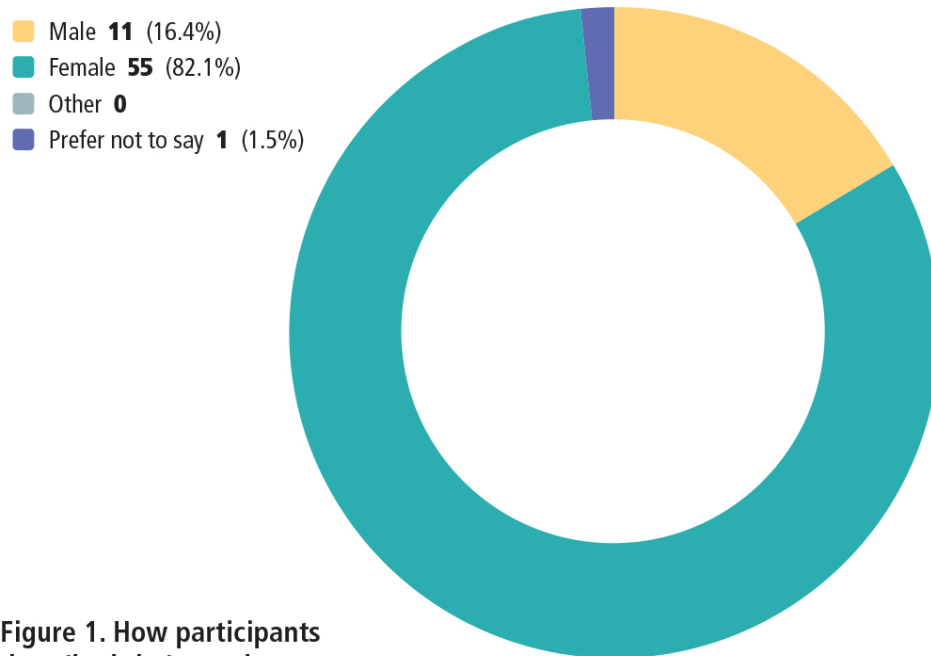

Figure 1. How participants described their gender

1  
2  
3  
4  
5  
6  
7  
8  
9  
10  
11  
12  
13  
14  
15  
16  
17  
18  
19  
20  
21  
22  
23  
24  
25  
26  
27  
28  
29  
30  
31  
32  
33  
34  
35  
36  
37  
38  
39  
40  
41  
42  
43  
44  
45  
46  
47  
48  
49  
50  
51  
52  
53  
54  
55  
56  
57  
58  
59  
60

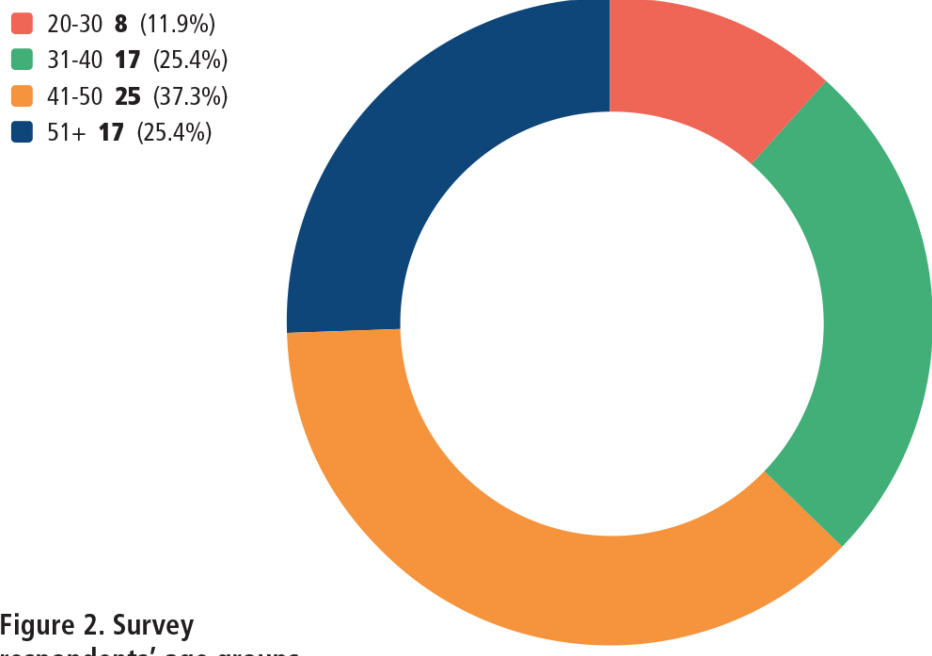

**Figure 2. Survey respondents' age groups**

Figure 2. Survey respondents' age groups

1  
2  
3  
4  
5  
6  
7  
8  
9  
10  
11  
12  
13  
14  
15  
16  
17  
18  
19  
20  
21  
22  
23  
24  
25  
26  
27  
28  
29  
30  
31  
32  
33  
34  
35  
36  
37  
38  
39  
40  
41  
42  
43  
44  
45  
46  
47  
48  
49  
50  
51  
52  
53  
54  
55  
56  
57  
58  
59  
60

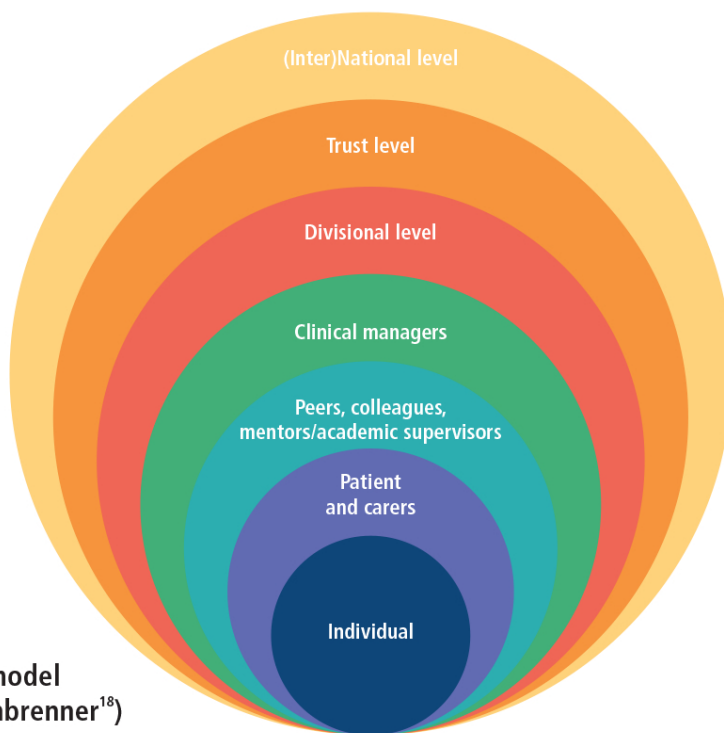

Figure 3. Ecological model (adapted from Brofenbrenner<sup>18</sup>)

Figure 3. Ecological model

# BMJ Open

## A mixed-methods study of challenges and benefits of clinical academic careers for nurses, midwives and allied health professionals

|                                 |                                                                                                                                                                                                                                                                                                              |
|---------------------------------|--------------------------------------------------------------------------------------------------------------------------------------------------------------------------------------------------------------------------------------------------------------------------------------------------------------|
| Journal:                        | <i>BMJ Open</i>                                                                                                                                                                                                                                                                                              |
| Manuscript ID                   | bmjopen-2019-030595.R1                                                                                                                                                                                                                                                                                       |
| Article Type:                   | Original research                                                                                                                                                                                                                                                                                            |
| Date Submitted by the Author:   | 15-Aug-2019                                                                                                                                                                                                                                                                                                  |
| Complete List of Authors:       | Trusson, Diane; University of Nottingham, School of Medicine<br>Rowley, Emma; University of Nottingham, Business School<br>Bramley, Louise; Nottingham University Hospitals NHS Trust, Institute of Nursing and Midwifery Care Excellence; University of Nottingham Faculty of Medicine and Health Sciences, |
| <b>Primary Subject Heading</b>: | Medical education and training                                                                                                                                                                                                                                                                               |
| Secondary Subject Heading:      | Qualitative research                                                                                                                                                                                                                                                                                         |
| Keywords:                       | Clinical Academic careers, Nurses, midwives and AHPs, Mixed methods, Interviews                                                                                                                                                                                                                              |
|                                 |                                                                                                                                                                                                                                                                                                              |

SCHOLARONE™  
Manuscripts

1  
2  
3 A mixed-methods study of challenges and benefits of clinical  
4  
5  
6 academic careers for nurses, midwives and allied health  
7  
8  
9 professionals  
10

11  
12 Authors: Diane Trusson, Emma Rowley, Louise Bramley  
13

14  
15 Correspondence address: Dr Diane Trusson, NIHR Collaboration for  
16  
17 Leadership in Applied Health Research and Care (CLAHRC) East Midlands,  
18  
19 Institute of Mental Health, University of Nottingham Innovation Park,  
20  
21 Triumph Road, Nottingham, NG7 2TU. [Diane.Trusson@nottingham.ac.uk](mailto:Diane.Trusson@nottingham.ac.uk)  
22  
23  
24

25 Phone: 0115 7484249  
26

27  
28 **Diane Trusson PhD:** Research Fellow NIHR CLAHRC East Midlands  
29  
30 (corresponding author); University of Nottingham School of Medicine,  
31  
32 Nottingham, UK. Orcid ID: 0000-0002-6995-1192  
33  
34

35  
36 **Emma Rowley PhD:** Capacity Development (Training Lead) NIHR  
37  
38 CLAHRC East Midlands; Nottingham University Business School,  
39  
40 Nottingham, UK. Orcid ID: 0000-0002-6668-1350  
41  
42  
43

44  
45 **Louise Bramley RN PhD:** Clinical Lead Research and Innovation,  
46  
47 Institute of Nursing and Midwifery Care Excellence, Nottingham University  
48  
49 Hospitals NHS trust, Nottingham, UK. Orcid ID: 0000-0002-0425-1734  
50  
51  
52

53  
54 **Key words:** Clinical Academic careers; Nurses, midwives and AHPs;  
55  
56 Mixed methods; Interviews  
57  
58

59 **Word count:** 4923  
60



## ABSTRACT

**Objectives:** The clinical academic trajectory for doctors and dentists is well-established, with research embedded in their career development. Recent years have also seen a burgeoning interest and push for nurses, midwives and allied health professionals (NMAHPs) to pursue a clinical academic career. However, the NIHR 10 year review suggested that there may be problems with progression post Master's degree level for this group, with nurses and midwives receiving less NIHR funding than AHPs. This study responds to these concerns, tracking the progression and exploring experiences of NMAHPs in the East Midlands region of England.

**Design:** An online survey and in-depth interviews were used to capture a wide range of experiences.

**Participants:** 67 NMAHPs who were pursuing a clinical academic career were surveyed, supplemented by 16 semi-structured in-depth interviews.

**Results:** Three themes emerged during data analysis: Embarking on a clinical academic career; overcoming barriers; and benefits.

**Conclusions:** NMAHPs are motivated to pursue a clinical academic career by a drive to improve services for the benefit of patients and the NHS more widely, as well as for personal development and career progression. People working in these roles have opportunities to explore possible solutions to issues that they encounter in their clinical role through academic study. Findings reveal benefits emanating from the individual

1  
2  
3 level through to (inter)national levels, therefore academic study should be  
4  
5 encouraged and supported. However, investment is needed to establish  
6  
7 more clinical academic roles to enable NMAHPs to continue to utilise their  
8  
9 experience and expertise post-PhD, otherwise the full extent of their  
10  
11 value will not be recognised.  
12  
13  
14  
15

## 16 **ARTICLE SUMMARY**

### 17 **STRENGTHS AND LIMITATIONS OF THIS STUDY –**

- 22 • Online survey gathered the views of 67 respondents outside of  
23 medicine and dentistry, representing a wide range of occupations  
24 and academic achievements.  
25  
26
- 27 • In-depth interviews with 16 respondents enabled exploration of  
28 issues around career progression and impact resulting from  
29 academic study.  
30  
31
- 32 • The study was limited geographically to one area of the UK.  
33  
34  
35  
36  
37  
38  
39  
40  
41  
42  
43  
44  
45  
46  
47  
48  
49  
50  
51  
52  
53  
54  
55  
56  
57  
58  
59  
60

## INTRODUCTION

### Background

There is a long tradition of doctors and dentists pursuing academic research alongside their clinical practice.<sup>1</sup> However, it is increasingly acknowledged that nurses, midwives and allied health professionals (AHPs) (henceforth NMAHPs) are also well-placed to devise solutions to the problems that they observe first hand in their day-to-day clinical practice.<sup>2</sup> A research-active workforce is important to the NHS, which aims to 'build the capacity and capability of our current and future workforce to embrace and actively engage with research and innovation'.<sup>3,p.6</sup> Furthermore, 'the NHS supports and harnesses the best research and innovations to improve patient outcomes, transform services and ensure value for money'.<sup>4,p.4</sup> Health Education England (HEE) and the National Institute of Health and Social Care Research (NIHR) have developed schemes to encourage NMAHPs to pursue postgraduate study in partnerships with the NHS and Higher Education Institutions (HEIs) across the UK, giving them 'the chance to bring their questioning minds, and expertise, to the research table'.<sup>2,p.2</sup>

However, in its 10 year report, the NIHR expressed concerns about the 'poor academic progression for non-medical professions from the Masters level',<sup>5,p.2</sup> particularly for nurses and midwives. This contrasts heavily with anecdotal evidence in the East Midlands area of England which suggests good levels of progression achieved by NMAHPs. Previous studies have

1  
2  
3 explored the experiences of doctors and dentists embarking on a clinical  
4  
5 academic career,<sup>6,7</sup> yet there is a gap in understanding about the  
6  
7 experiences of NMAHPs. The first regional practitioner network for clinical  
8  
9 academics<sup>8</sup> (a joint innovation established between NIHR CLAHRC East  
10  
11 Midlands and Nottingham University Hospitals NHS Trust), offered an  
12  
13 opportunity to close this gap.  
14  
15  
16

17  
18 The study aimed to track progression of clinical academic NMAHPs in the  
19  
20 East Midlands; to explore challenges in combining academic study with  
21  
22 clinical practice; and to demonstrate the impact on patient outcomes and  
23  
24 value of investing in clinical academic careers for NMAHPs.  
25  
26  
27

## 28 29 **METHODS**

### 30 31 **Study design**

32  
33  
34 The study had two data gathering components. In the first stage a  
35  
36 questionnaire enabled demographic details and progression data to be  
37  
38 gathered, with opportunities for free text responses. The second stage of  
39  
40 the study used qualitative methodology to enable deeper exploration of  
41  
42 experiences from the interviewees' perspective. An interpretive approach  
43  
44 was adopted to gather experiences including feelings, emotions and  
45  
46 motivation which cannot be measured in an objective way.<sup>9</sup>  
47  
48  
49  
50  
51  
52  
53  
54  
55  
56

57  
58 This manuscript has been prepared according to the Standards for  
59  
60 Reporting Qualitative Research<sup>10</sup> (see online supplementary file 1).

## Research Team

The team, who are all experienced researchers, consisted of a medical sociologist, a knowledge translation manager and a clinical academic lead nurse. Authors b and c established the East Midlands Clinical Academic Practitioner Network;<sup>8</sup> author a who conducted all the interviews, had no prior relationship with the target population.

## Context

The research took place in the East Midlands area of England which encompasses 8 acute Trusts, 5 mental health Trusts, 1 ambulance service and 17 CCGs.<sup>11,12</sup>

## Recruitment

A link to the online survey<sup>13</sup> was emailed to members of the East Midlands Clinical Academic Practitioner Network<sup>8</sup> and was publicised through social media platforms. Potential respondents were informed that the study aimed to track their progression and identify how they had overcome any challenges along the way. It was emphasised how sharing their experiences could help to ensure smooth progression for future trainees.

The interviewees were self-selected, having indicated their willingness to be interviewed in their survey responses. The rest were recruited through snowball sampling. Although this method has implications for confidentiality and anonymity, it was an effective way of identifying individuals whose experiences were relevant to the research.<sup>14</sup>

## **Ethical considerations**

Under the guidance provided by the Health Research Authority,<sup>15</sup> ethical approval was not required for this study because participants were recruited by virtue of their participation in educational programmes, rather than their NHS status. Nevertheless, good research governance was observed, i.e. information was provided to participants and verbal consent was obtained prior to each interview. Participants were made aware of their right to withdraw from the study, assured that any data published would be anonymised, and that data would be stored confidentially on secure University systems.

## **Data collection methods**

A Bristol Online Survey<sup>13</sup> was created (see online supplementary file 2), aiming to:

- I. Track the progression of clinical academics across the pathway and
- II. Explore the ways in which training programmes and clinical academic roles had impacted on the respondents' clinical practice.

The survey was open for a 2 month period. This was followed by 16 semi-structured, in-depth interviews.

## **Data collection instruments**

The survey and interview topic guide (see online supplementary file 3) were designed by the research team. Interviews began with an open question inviting participants to describe their experiences of being a

1  
2  
3 clinical academic followed by a series of questions aimed at exploring  
4 changes to clinical practice as a result of academic training, the impact of  
5 their research and any influence on their colleagues. The topic guide  
6 enabled cross-case comparability while the semi-structured format  
7 enabled flexibility with the order of the questions so that topics could  
8 emerge naturally through the interview and allowing participants to  
9 elaborate and give examples to support their answers.<sup>14</sup> Participants were  
10 also invited to add further comments at the end of the interview. Each  
11 interview lasted around one hour; they were digitally recorded with  
12 participants' consent.

### Interview sample

| Case study | Clinical role | Stage of study (at interview) | PhD year | Age group | Gender |
|------------|---------------|-------------------------------|----------|-----------|--------|
| 1          | Nurse/midwife | Thesis pending                |          | 20-30     | Female |
| 2          | Nurse/midwife | PhD                           | 2        | 41-50     | Female |
| 3          | Nurse/midwife | PhD                           | 4        | 41-50     | Female |
| 4          | Nurse/midwife | Post-doc                      |          | 41-50     | Female |
| 5          | Nurse/midwife | PhD                           | 3        | 41-50     | Female |
| 6          | AHP           | PhD                           | 4        | 41-50     | Female |
| 7          | AHP           | PhD                           | 2        | 41-50     | Female |
| 8          | Nurse/midwife | PhD                           | 5        | 41-50     | Female |
| 9          | Nurse/midwife | Post-doc                      |          | 31-40     | Male   |
| 10         | AHP           | PhD                           | 2        | 41-50     | Female |
| 11         | AHP           | PhD                           | 1        | 41-50     | Female |
| 12         | AHP           | PhD                           | 4        | 51+       | Male   |
| 13         | AHP           | PhD                           | 3        | 31-40     | Male   |

|    |     |          |   |       |      |
|----|-----|----------|---|-------|------|
| 14 | AHP | PhD      | 3 | 41-50 | Male |
| 15 | AHP | Post-doc |   | 51+   | Male |
| 16 | AHP | PhD      | 1 | 31-40 | Male |

Table 1. Interview sample characteristics

## Data processing

Following professional transcription, data were anonymised with all identifying aspects removed from the transcripts prior to analysis. In the results section below, participants are identified by their interview case study (CS) or survey respondent (SR) number and professional group only, to preserve anonymity.

## Data analysis

Survey responses were collated and summarised using the Bristol Online Survey<sup>13</sup> software. Descriptive numerical data were represented in graphs and tables.

Qualitative data from the free-text survey responses and the interview transcripts were combined and analysed using thematic analysis. This involved reading through the data to manually identify 'patterned responses or meaning within the data set'.<sup>16,p.82</sup> Themes which arose iteratively from the data, were discussed and agreed by the research team which enhanced trustworthiness of the analysis.<sup>14</sup>

## Rigour



1  
2  
3 All three authors were involved in the research design and in data  
4 verification throughout the data collection and analysis processes to  
5 assure quality and rigour.  
6  
7  
8  
9

## 10 **RESULTS**

### 11 **Respondents**

12  
13  
14  
15  
16  
17 There were 81 responses to the online survey; however 14 responses  
18 were excluded because they were not members of the East Midlands  
19 Clinical Academic Practitioner Network. This is a limitation of using social  
20 media to publicise the survey.  
21  
22  
23  
24  
25  
26

27  
28 The following sections report the findings from a combination of survey  
29 and interview data with a particular focus on the academic pathway.

30  
31  
32 Three major themes are discussed: embarking on a clinical academic  
33 career; overcoming barriers; and benefits of clinical academic research.  
34  
35  
36 Within this discussion are issues around funding, management support,  
37 impact, and encouraging future clinical academic leaders.  
38  
39  
40  
41  
42

### 43 *Gender*

44  
45  
46 *Figure 1. How participants described their gender*  
47  
48

49 The gender split of participants (see figure 1) was expected, due to the  
50 predominantly 'female gendered' occupations being questioned. For  
51 example, the majority of nurses (who outnumber AHPs considerably) and  
52 midwives, identify as female.<sup>17</sup> There were 26 respondents in the study  
53 who held these roles.  
54  
55  
56  
57  
58  
59  
60

## Age

Figure 2. Survey respondents' age groups

Despite the Health Education England (HEE) aim of producing future clinical academic leaders early in their career,<sup>3</sup> results in figure 2 illustrate that funding is currently being used to support individuals at mid/late career stage. Consequently, there may be potential implications for the career level (progression) and impact NMAHP clinical academics are able to achieve before they reach retirement age. This contrasts to the rhetoric of investing in future leaders, while also suggesting that 'the potential of high-achieving graduates is underexploited'<sup>18,p.8</sup> as participants were waiting some years post-undergraduate award, to pursue clinical academic ambitions.

The current culture within the clinical setting was described as a particular barrier for clinical academic progression by participants in the 20-30 year age bracket:

I have come across lots of negativity in pursuing a clinical academic career as a nurse who is only a few years qualified (SR13 nurse/midwife).

They think to be an expert in your field you must've been qualified for like fifteen plus years. Well that's just ridiculous because I know a lot more than some colleagues who've been working double the amount of time that I have and that's just because I like to understand why I'm doing what I'm doing (CS1 nurse/midwife).

1  
2  
3 This indicates a need for a culture change so that NMAHPs are supported  
4 to join the clinical academic career trajectory at an earlier stage, for  
5  
6 instance through the apprenticeship model.<sup>19</sup> It seems that in some  
7  
8 cases, individuals are expected to have a number of years' experience  
9  
10 and a secure clinical role before they are supported to embark on the  
11  
12 clinical academic pathway, rather than being able to develop parallel roles  
13  
14 like their medical colleagues.  
15  
16  
17  
18  
19  
20

## 21 **Embarking on a clinical academic career**

### 22 *Motivation*

23  
24 In contrast to doctors and dentists, research has not traditionally been a  
25  
26 career route for NMAHPs. Participants described being self-motivated to  
27  
28 pursue research, rather than follow a pre-defined path:  
29  
30  
31  
32  
33

34 I've always, from very early on in my clinical career, had an interest  
35  
36 in evidencing the work that I was doing. So I self-motivated really,  
37  
38 did service audits and evaluations (CS14 AHP).  
39  
40  
41

42 Participants overwhelmingly described how their interest in research was  
43  
44 driven by improvements to patient care:  
45  
46  
47

48 Clinical academics are part of the solution. We can innovate and  
49  
50 generate the solutions for these age-old problems that we're  
51  
52 seeing, having a robust methodological approach to understanding  
53  
54 and exploring the phenomena. But also developing and testing  
55  
56 interventions to address these problems (CS9 nurse/midwife).  
57  
58  
59  
60

1  
2  
3 This illustrates the potential value of investing in clinical academic careers  
4 for NMAHPs who can move change from an idea into a tested intervention  
5 within their clinical practice.<sup>20</sup>  
6  
7  
8  
9

10  
11 Participants often considered leadership of other people in their decision  
12 to pursue academic study:  
13  
14

15  
16  
17 I want to do this for me, but I also want to do it for my daughters  
18 to show that women can be in science and can lead in these fields  
19 and yes we might have to juggle family things and children, but  
20 you can do it (CS7 AHP).  
21  
22  
23  
24  
25  
26

27  
28 Undertaking doctoral training and following a clinical academic career was  
29 also perceived to be about leadership opportunities and potential, as well  
30 as building a culture within the NMAHP professions so that many others  
31 could follow the path started by the few.  
32  
33  
34  
35  
36

37  
38 It's essential for me to have a PhD because we need people to  
39 mentor, to supervise. I need to be at that level for the staff coming  
40 through, to help them (CS8 nurse/midwife).  
41  
42  
43  
44  
45  
46  
47  
48

## 49 **Overcoming barriers**

### 50 51 52 53 54 55 **Funding** 56 57 58 59 60

1  
2  
3 The survey respondents included 35 current PhD students and 10 post-  
4  
5 doctoral NMAHP clinical academics. Of these, 11 respondents' PhDs were  
6  
7 funded by the NIHR, 2 of which were the highly competitive and  
8  
9 prestigious NIHR Clinical Research Doctoral Fellowship:  
10  
11

12  
13  
14 With a mortgage, a baby, one on the way it was only an NIHR  
15  
16 fellowship... it was that or nothing (CS13 AHP).  
17

18  
19 I'm the main breadwinner, I earn more than my husband ... so that  
20  
21 financial part was a big barrier for me. I knew that the best financial  
22  
23 support were the NIHR ones, so I took that time to develop that  
24  
25 application. It didn't just affect me, it would affect the whole family  
26  
27 (CS7 AHP).  
28  
29  
30  
31

32  
33 Students who did not manage to get NIHR funding were likely to be  
34  
35 offered standard UK Research and Innovation stipends (approx. £14.5K  
36  
37 per year).<sup>21</sup> This was problematic for participants who had often reached  
38  
39 high pay bands by the time they embarked on an academic pathway (e.g.  
40  
41 the £40K+per year salaries for a senior band 7/8 practitioner).<sup>22</sup> It also  
42  
43 meant they faced tricky decisions and negotiations about pension and  
44  
45 employment rights:  
46  
47  
48  
49

50  
51 Clearly I think an obstacle is when you get to that high clinical  
52  
53 level and you've got mortgages and things, it makes it very  
54  
55 difficult to do it on a basic stipend (CS14 AHP).  
56  
57  
58  
59  
60

1  
2  
3 Some participants had received financial support from their employer  
4  
5 which enabled them to make the move into academic study:  
6  
7

8  
9 My employers said that if I applied for a stipend and was successful  
10  
11 they would top me up to my full salary which would allow me to do  
12  
13 it essentially full-time (CS14 AHP).  
14  
15

16  
17 However, this experience was not the norm; rather, NMAHPs were being  
18  
19 forced to make sacrifices in order to develop their career portfolio and  
20  
21 skills. Nevertheless, 23 respondents (including 11 who had progressed  
22  
23 from the NIHR funded Master's degree in Research Methods) secured PhD  
24  
25 funding from alternative sources as indicated in figure 3 below:  
26  
27  
28

29  
30 *Figure 3. Non-NIHR PhD funding*  
31  
32

33  
34  
35 These 23 respondents included 11 nurses and 1 midwife which is  
36  
37 interesting in terms of the NIHR 10 year report which says that **nurses**  
38  
39 **and non-healthcare professionals are less successful** and, 'For ICA,  
40  
41 the **lower success for nurses is a particular concern**'<sup>5,p.11</sup> (emphasis  
42  
43 added). Our (regional) findings suggest that nurses are successful in  
44  
45 securing alternative funding for their PhD studies, therefore NIHR metrics  
46  
47 may not be appropriately capturing all NMAHP progression. By restricting  
48  
49 progression metrics to purely NIHR funding sources, they are providing a  
50  
51 narrative that does not reflect the experiences of clinical academics from  
52  
53 these occupations working across the East Midlands region.  
54  
55  
56  
57  
58  
59  
60

### *Maintaining a clinical role*

The NIHR's guide to the Integrated Clinical Academic (ICA) Programme describes how 'the individual's academic and clinical 'jobs' are not mutually exclusive but are instead complementary, informing and supporting each other, and definable within a single role'.<sup>23,p6</sup> Participants described the benefits of working in their clinical setting:

When I was on the ward I could kind of forget about the PhD but also recognise how it was shaping me as a nurse. (CS1 nurse/midwife).

However, working at the same time as doing a PhD was identified as challenging. One participant who had secured a prestigious post before completing her PhD said:

The promotion is massive and the PhD is hugely important. You've got to somehow survive with the work and academia all at once and not fall down the rabbit hole and get lost. Yeah that's a big challenge (CS8 nurse/midwife).

Recognising this challenge, the Council of Deans of Health recommend 'support from the clinical side including agreed study time'<sup>18,p.9</sup> for clinical academics. However, a recurring theme in the data was that managers are often dealing with operational care delivery challenges and were unwilling, or unable, to release staff to do research:

1  
2  
3 You have to get your line manager to sign the application form to  
4 say they'll support you and it took a lot of effort to get that signed.  
5  
6 They only gave in because my contract was 22½ hours a week.  
7  
8 They said "what you do in the rest of the time is your own business,  
9  
10 but it can't impact on this, we're not giving you any time off". It  
11  
12 was "what's this got to do with your job"? (CS5 nurse/midwife).  
13  
14  
15  
16  
17  
18  
19

20 A common, potentially problematic issue encountered by the respondents  
21  
22 was an apparent lack of recognition of the value of research:  
23  
24

25 There's a huge untapped workforce...with the right support and time  
26  
27 we could be doing things more effectively and more efficiently, but  
28  
29 that isn't necessarily valued in organisations. We've got to see this  
30  
31 many patients, [we're] not using our skills of criticality, reflectivity;  
32  
33 we're not going to innovate and change practice (CS7 AHP).  
34  
35  
36  
37

38 Despite their achievements during the PhD, many participants expressed  
39  
40 anxieties about their future careers, having been made to move aside  
41  
42 clinically in order to progress their academic ambitions, rather than being  
43  
44 able to develop their academic and clinical skills in tandem. For example a  
45  
46 dietician said:  
47  
48  
49

50  
51 Recently I've had to step out of my area of expertise... I'm just doing  
52  
53 general, allergies, weight management, which is not my area, but I  
54  
55 need to pay the mortgage (CS10 AHP).  
56  
57  
58  
59  
60



1  
2  
3 This indicates a serious lack of organisational and professional value  
4 placed on the knowledge and skills achieved by some clinical academics.  
5  
6  
7  
8 As a result, some participants felt there might be no option to stay in their  
9  
10 clinical role post-PhD:  
11

12  
13 I would be keen to stay more NHS-based but constraints with  
14 funding and time might end up pushing quite a few of us out into  
15 university (CS2 nurse/midwife).  
16  
17  
18  
19

20  
21 I currently work for an NHS trust, but the lack of support makes me  
22 wonder if the only option is to not work clinically, or work  
23 bank/agency, which to me is not embracing the value clinical  
24 academics can bring to the clinical area (CS13 nurse/midwife).  
25  
26  
27  
28  
29

30  
31  
32 In contrast to the clear career trajectory for doctors and dentists, 'early  
33 career clinical academics face uncertain career paths and may choose the  
34 comparably stable worlds of clinical practice where their skills are in high  
35 demand, or a dedicated academic career.'<sup>3,p.9</sup> The main reason being; 'the  
36 scarcity and highly competitive nature of NMAHP postdoctoral research  
37 positions (...) and the comparative lack of research funding for healthcare  
38 professions other than medicine'<sup>3,p.9</sup> as this participant articulated:  
39  
40  
41  
42  
43  
44  
45  
46  
47  
48

49 My frustration [is that] the pathway is a pyramid therefore some  
50 people will not progress up (CS12 AHP).  
51  
52  
53  
54

55 The participants who had successfully negotiated this 'pyramid' generally  
56 did so with the help and support of key individuals within the organisation  
57  
58  
59  
60

1  
2  
3 who were able to champion the cause of aspiring clinical academics at  
4  
5 board level. For example:  
6  
7

8  
9 I have a very supportive divisional head nurse and have been  
10  
11 appointed into a trailblazer post; we haven't got anything similar  
12  
13 within the organisation. So there's real potential to forge out  
14  
15 innovative ways in which clinical academics can fulfil that remit of  
16  
17 working in clinical practice and undertaking research, but also pave  
18  
19 the way for others that want to come up (CS9 nurse/midwife).  
20  
21  
22

23  
24 Similarly, the chief medical officer argues that 'developing the next  
25  
26 generation of research leaders in clinical research is essential to the  
27  
28 UK'<sup>24,p.502</sup> but the data suggest a cliff-edge in the pathway; greater  
29  
30 numbers of practitioners are embarking on clinical academic careers, but  
31  
32 following PhD, opportunities are scarce. The fortunate have the  
33  
34 organisational backing to 'trail-blaze', but others face a decision to return  
35  
36 to their pre-PhD clinical role (and hence not have their academic skills  
37  
38 recognised and utilised) or follow a traditional academic research pathway  
39  
40 and leave their clinical post behind (thus negating the whole reason for  
41  
42 pursuing a clinical academic career).  
43  
44  
45  
46  
47  
48

## 49 **Benefits and impact**

50  
51 The data revealed multiple levels of impact and the value of academic  
52  
53 research as the ecological model<sup>25</sup> in figure 4 illustrates:  
54  
55  
56

57 *Figure 4. Ecological model*  
58  
59  
60

### *Individual level*

Participants reported benefits such as job satisfaction, increased awareness of research, enhanced skills and sense of achievement. Progression post-master's level was achieved by 52 respondents, of whom 19 were nurses/midwives. Although this echoes concerns for the relatively low progression rates of nurses/midwives when compared to AHPs<sup>5</sup>, 6 nurses/midwives were pursuing Master's level courses at the time of the survey and may have since progressed.

The clinical academic pathway had presented opportunities for career progression. One participant had been 'talent-spotted' and offered 'numerous extra employment and development opportunities'. When asked about any changes to their employment/role/grade since embarking on the clinical academic pathway, almost half (31) of the 63 survey responses described positive changes, although 5 of these reported no change in their pay band. Six had been seconded but risked reverting to their lower pay band when the secondment ended.

Respondents who had gained clinical academic roles described having separate contracts of employment (i.e. one each for NHS and academia) with separate employment and pension rights. Nine respondents had been promoted with one becoming a consultant midwife, and another achieving a clinical lectureship (a pivotal post in the NIHR ICA funded clinical academic trajectory).

### *Patients and their carers*

The research undertaken by the participants could potentially make a big difference to patient outcomes and experiences. For example, an AHP had identified an element of practice that could extend and improve the lives of seriously ill children. Another participant had introduced a pre-surgery exercise programme which helped patients to feel involved in the process and was highly rated in a patient satisfaction survey.

These examples illustrate how NMAHPs on a clinical academic pathway are uniquely placed to develop interventions which can be easily implemented with positive results for patient care.

### *Peers/colleagues*

Many participants described their pride at becoming role models, able to support other colleagues into academic study:

I've mentored a lot of different kinds of professions to actually realise that it is doable. That's a really rewarding side to the job to think that you might have helped somebody [to] be a more able clinician, a more able academic which can then impact on the patient (CS7 AHP).

This demonstrates the important role of mentors in encouraging future clinical leaders by providing 'pastoral support and help[ing] mentees deal

1  
2  
3 with the demands of a clinical academic research career.<sup>18,p.10</sup> It also  
4  
5 reveals the value of investing in staff who then give back.  
6  
7

### 8 9 *NHS Trust*

10  
11  
12  
13  
14 Recognising that research intensive organisations have better patient  
15  
16 outcomes, the Care Quality Commission have introduced research into its  
17  
18 quality framework.<sup>26</sup> Respondents described numerous benefits for the  
19  
20 NHS organisations who supported clinical academic careers. For example:  
21  
22

23  
24  
25 At the hospital they want this Magnet status.<sup>27</sup> The three domains  
26  
27 are good clinical outcomes; patient experience; and staff experience  
28  
29 and part of [that] is having well qualified nurses. They really want  
30  
31 to increase the academic underpinnings of nurses and have research  
32  
33 leaders...what I'm doing really ticks the boxes of Magnet (CS5  
34  
35 nurse/midwife).  
36  
37  
38

39  
40 Participants highlighted how supporting clinical academic careers could  
41  
42 address current issues with recruitment and retention:  
43  
44

45  
46 Forty thousand nurses we have a national deficit of, so people can  
47  
48 choose where they want to work. They'll be looking for  
49  
50 organisations that are aspirational. So actually offering innovative  
51  
52 career pathways that can intellectually challenge, but also have that  
53  
54 direct patient care element, is going to be attractive to a lot of  
55  
56 people (CS9 nurse/midwife).  
57  
58  
59  
60

1  
2  
3 These comments resonate with the NIHR's advice for aspiring clinical  
4 academics 'to base themselves within organisations where the importance  
5 of research is well understood and clinical academic careers are  
6 appropriately supported.'<sup>23,p.6</sup>  
7  
8  
9  
10  
11

12  
13 The data revealed numerous examples of impact resulting from  
14 participants' clinical academic careers, including the potential for  
15 substantial savings. For example, one participant's intervention removes  
16 the need for GPs' referral for physiotherapy, potentially saving  
17 'multimillion pounds' across the NHS, and has subsequently been  
18 recognised in the NHS long-term plan.<sup>28</sup> This illustrates how clinical  
19 academics can develop 'well informed and relevant research'<sup>4,p.5</sup> that can  
20 quickly be transferred into practice for the benefit of the NHS.  
21  
22  
23  
24  
25  
26  
27  
28  
29  
30  
31  
32

### 33 *Inter(national)*

34  
35  
36  
37  
38

39 Participants provided details of multiple academic journal articles and  
40 conference presentations enabling worldwide dissemination of their  
41 research. In addition, one participant was invited to join an International  
42 Working Party developing consensus guidelines for treating children with  
43 kidney disease.  
44  
45  
46  
47  
48  
49  
50

51 In another example, an open-access resource to help professionals to deal  
52 with children in mental health crises, specifically those at risk from self-  
53 harm, had been 'disseminated nationally, not just within health, but also  
54 in social care and education settings'. This illustrates the wide-ranging  
55  
56  
57  
58  
59  
60

1  
2  
3 impact of clinical academics' research which can occur more speedily than  
4  
5 traditional research.  
6  
7

8  
9 These reported experiences represent a small snapshot of the benefits of  
10  
11 supporting NMAHPs to pursue clinical academic careers and the need to  
12  
13 do so, as one participant articulated:  
14  
15

16  
17 Moving forward we have to look at more sustainable and integrated  
18  
19 approaches to embedding clinical academic careers. I'm excited to  
20  
21 hear that there's an apprenticeship framework coming out because  
22  
23 for clinical academic careers to be truly embedded within non-  
24  
25 medical professional career pathways, it has to be driven by the  
26  
27 NHS. Universities get the value of clinical academics and they're on  
28  
29 board, but for it to truly work, we need to have change within the  
30  
31 NHS (CS9 nurse/midwife).  
32  
33  
34  
35  
36  
37  
38  
39  
40

## 41 **DISCUSSION**

42  
43 This study has explored the experiences of NMAHPs in the context of the  
44  
45 NIHR 10 year report which expressed concern about the 'poor academic  
46  
47 progression for non-medical professions from the Masters level'.<sup>5,p.2</sup> Our  
48  
49 data reveal that NMAHPs do progress post-Masters; albeit through  
50  
51 alternative means than the NIHR pathway. In addition, the findings  
52  
53 indicate good levels of career progression post-PhD, including progression  
54  
55 into consultant midwife and clinical lectureship fellowship roles, and the  
56  
57  
58  
59  
60

1  
2  
3 far-reaching impact of research. Success was achieved despite barriers  
4 such as a lack of organisational and managerial support for NMAHPs  
5  
6 wanting to pursue a clinical academic career path. Although operational  
7  
8 challenges to care delivery are to be acknowledged, this suggests a need  
9  
10 for a change of culture in line with NHS recommendations for a research-  
11  
12 active workforce, especially in under-represented roles such as nurses  
13  
14 and midwives.<sup>5</sup>

15  
16  
17  
18  
19  
20  
21 The results of this study confirm that AHPs are more likely than  
22  
23 nurses/midwives to progress post-Master's degree.<sup>5</sup> One possible  
24  
25 explanation is that there may be some association with the length of time  
26  
27 that AHPs have been an all degree profession whereas until relatively  
28  
29 recently, only a small proportion of nurses graduated with a degree.<sup>29</sup>  
30  
31  
32  
33 Once the degree pathway becomes more embedded and clinical academic  
34  
35 role models more common, nurses may make earlier career decisions to  
36  
37 engage with research training, and choose to follow a clinical academic  
38  
39 trajectory, rather than management or specialist services which are the  
40  
41 more traditional career pathways. Also of concern is the relatively late age  
42  
43 of NMAHPs embarking on the clinical academic pathway. To address this,  
44  
45 the Council of Deans recommend that all health professionals are exposed  
46  
47 to the benefits of health research at undergraduate level<sup>18</sup> and  
48  
49 encouraged to embark on a clinical academic pathway earlier in their  
50  
51 careers. This aims to promote a culture where research is the norm,  
52  
53 rather than the exception, supporting the HEE aim of 'raising the profile of  
54  
55 research and innovation amongst the potential future workforce as an  
56  
57  
58  
59  
60



1  
2  
3 integral part of all healthcare roles'.<sup>3,p,10</sup> A recurrent theme amongst  
4  
5 NMAHPs who had achieved success was having champions and role  
6  
7 models who mentored them and were able to promote the benefit of  
8  
9 supporting clinical academics at the Executive Board level. The national  
10  
11 Clinical Academic Roles Development Group recommend mentorship as an  
12  
13 enabler of success<sup>20</sup> which this study's findings support, whilst also  
14  
15 showing how current clinical academics mentor their junior colleagues.  
16  
17  
18 Critical mass is important and therefore it is essential that aspiring  
19  
20 NMAHP clinical academics bring others with them.  
21  
22  
23  
24  
25  
26  
27

28 Like previous research, this study's findings suggest a disconnect between  
29  
30 priorities at senior management level and 'what happens on the ground'.  
31  
32  
33 <sup>30,p39</sup> To combat this, the Clinical Academic Roles Development Group  
34  
35 recommends that 'evidence of the link between clinical academic roles  
36  
37 and improved outcomes/patient benefit/research activity etc.' is vital for  
38  
39 securing ongoing investment in clinical academic careers.<sup>20, p.18</sup> This study  
40  
41 has demonstrated how NMAHPs' innovative research has potential to  
42  
43 increase efficiency, with potential cost-benefits for the NHS, as well as  
44  
45 benefitting HEIs through grants and publications they generate, providing  
46  
47 a bridge between tensions in priorities of the NHS (efficient services and  
48  
49 improved patient outcomes) and HEIs (grants income generation and  
50  
51 publications).<sup>29</sup> It follows that close partnerships between NHS and HEI  
52  
53 organisations should be developed following Southampton's model, where  
54  
55 NHS and HEI partners have successfully collaborated to build academic  
56  
57  
58  
59  
60

1  
2  
3 pathways and increase research capacity.<sup>1,20</sup> Encouraging a research-  
4  
5 active workforce is also important for recruitment and retention of 'highly  
6  
7 motivated clinicians who often become the leaders of tomorrow'.<sup>20, p.11</sup>  
8  
9  
10  
11 NMAHPs are committed to conducting high-quality research alongside  
12  
13 their clinical role. However, pursuing a clinical academic pathway was  
14  
15 likened to a pyramid where progression becomes increasingly challenging.  
16  
17 In contrast to their medical colleagues whose medical and academic  
18  
19 training occurs in tandem, many NMAHP participants undertaking PhDs  
20  
21 were faced with the prospect of having no job to return to, or taking pay  
22  
23 cuts or reduced hours. The findings indicate an urgent need for a clinical  
24  
25 academic pay scale, whereby clinical and academic skills are valued  
26  
27 equally by NHS and HEI organisations, and a coherent career pathway to  
28  
29 be developed for NMAHPs post-PhD, where research experience is valued  
30  
31 and utilised.<sup>20</sup> Having a job description which enables research within a  
32  
33 clinical role would avoid the dilemma faced by some participants in this  
34  
35 study who were considering a purely academic career with a resultant loss  
36  
37 of expertise for the NHS. Similarly, the Council of Deans recommend  
38  
39 allocating funding and mentoring to enable clinicians with doctorates to  
40  
41 develop both sets of skills; pointing out that 'a PhD is the 'end of the  
42  
43 beginning' of research training rather than an end in itself'.<sup>18,p.10</sup>  
44  
45  
46  
47  
48  
49  
50  
51  
52

### 53 **Strengths and limitations**

54  
55  
56 The mixed methods used in this study enabled data collection from a wide  
57  
58 range of health professionals using strengths of different approaches<sup>14</sup> to  
59  
60

1  
2  
3 create a fuller picture of NMAHPs' experiences of embarking on a clinical  
4  
5 academic pathway. Although limited in number and by geographical  
6  
7 location, the data provide useful insights into the experiences of this  
8  
9 under-researched group and provide a foundation for future studies of  
10  
11 NMAHPs' experiences in other locations. A further limitation is that  
12  
13 although comparisons were made with medical colleagues, their  
14  
15 experiences were not sought for this study. However, a comparative  
16  
17 study with medical clinical academics in the East Midlands is currently  
18  
19 underway.  
20  
21  
22  
23  
24  
25  
26  
27  
28

## 29 **CONCLUSION**

30  
31  
32  
33  
34 This study has discussed NMAHPs' motivations for embarking on a clinical  
35  
36 academic pathway and how challenges were overcome along the way. It  
37  
38 shows how investing in clinical academic training for NMAHPs is vital in  
39  
40 developing and retaining a research-active workforce where patient care  
41  
42 remains the central consideration. However, in order to do this, there  
43  
44 needs to be support at all organisational levels to enable NMAHPs to  
45  
46 engage in developing a clinical academic career, and preferably at an  
47  
48 earlier stage in their career development. In addition, investment is  
49  
50 needed to establish more clinical academic roles post PhD. The Clinical  
51  
52 Academic Roles Development Group (formally hosted by and known as  
53  
54 the AUKUH group) have produced a range of recommendations in this  
55  
56  
57  
58  
59  
60

1  
2  
3 respect, along with concrete examples of successful implementation of  
4  
5 clinical academic posts from across the UK<sup>20</sup> Developing and facilitating a  
6  
7 clear clinical academic career path will ensure that both the clinical and  
8  
9 research expertise and experience of clinical academic NMAHPs continues  
10  
11 to be utilised fully for the benefit of patients and the NHS as a whole.  
12  
13  
14  
15  
16  
17  
18  
19  
20  
21  
22  
23  
24  
25  
26  
27  
28  
29  
30  
31  
32  
33  
34  
35  
36  
37  
38  
39  
40  
41  
42  
43  
44  
45  
46  
47  
48  
49  
50  
51  
52  
53  
54  
55  
56  
57  
58  
59  
60

For peer review only

## REFERENCES

1. Westwood G, Richardson A, Latter S, et al. Building clinical academic leadership capacity: sustainability through partnership. *Journal of Research in Nursing*, 2018;23(4)346-357.
2. Trueland J. Birth of a new breed. *Health Service Journal supplement* 2015; <https://www.hsj.co.uk/Uploads/y/r/i/Research--Impact-supplement-18th-Nov-2015.pdf> accessed 13/2/2019
3. Health Education England <https://www.hee.nhs.uk/sites/default/files/documents/HEE%20research%20and%20innovation%20strategy.pdf> accessed 18/2/2019
4. NHS England research plan <https://www.england.nhs.uk/wp-content/uploads/2017/04/nhse-research-plan.pdf>
5. NIHR Trainees Coordinating Centre <https://www.nihr.ac.uk/our-research-community/documents/TCC-NIHR-Strategic-Review-of-Training-2017.pdf>
6. Funston G, Cerra C, Kirkham D, et al. The road to a clinical academic career. *BMJ* 2015;350:h786
7. Lopes J, Ranieri V, Lambert T, et al. The clinical academic workforce of the future: a cross-sectional study of factors influencing career decision-making among clinical PhD students at two research-intensive UK universities. *BMJ Open* 2017;7.8:e016823.

1  
2  
3 8. East Midlands Clinical Academic Practitioner Network  
4

5 [http://www.clahrc-em.nihr.ac.uk/about/east-midlands-clinical-academic-](http://www.clahrc-em.nihr.ac.uk/about/east-midlands-clinical-academic-practitioner-network)  
6 [practitioner-network](http://www.clahrc-em.nihr.ac.uk/about/east-midlands-clinical-academic-practitioner-network)  
7  
8

9  
10  
11 9. Benton T, Craib I. *Philosophy of Social Science: The Philosophical*  
12 *Foundations of Social Thought*, Basingstoke, Palgrave 2001  
13  
14

15  
16 10. O'Brien BC, Harris IB, Beckman TJ, et al. Standards for Reporting  
17 Qualitative Research: A Synthesis of Recommendations. *Academic*  
18 *Medicine*, 2014;89(9):1245-1251.  
19  
20  
21

22  
23  
24 11. Regional Voices  
25

26 [http://www.oneeastmidlands.org.uk/whoswhoeastmidshealthsocialcare#E](http://www.oneeastmidlands.org.uk/whoswhoeastmidshealthsocialcare#East%20Midlands%20Hospitals)  
27 [ast%20Midlands%20Hospitals](http://www.oneeastmidlands.org.uk/whoswhoeastmidshealthsocialcare#East%20Midlands%20Hospitals) (accessed August 2019)  
28  
29  
30

31  
32 12. NHS England and NHS Improvement Midlands  
33

34 <https://www.england.nhs.uk/midlands/ccgs-and-acute-trusts/> (accessed  
35 August 2019)  
36  
37  
38

39  
40 13. Bristol Online Survey <https://www.onlinesurveys.ac.uk>  
41

42  
43 14. Bryman A. *Social Research methods*, 4<sup>th</sup> edn. Oxford: Oxford  
44 University Press 2012  
45  
46

47  
48 15. Health Research Authority <https://www.hra.nhs.uk/> (accessed August  
49 2019)  
50  
51  
52

53  
54 16. Braun V, Clarke V. Using thematic analysis in psychology. *Qualitative*  
55 *research in psychology* 2006;3(2):77-101.  
56  
57  
58  
59  
60

- 1  
2  
3 17. Nursing and Midwifery Council. The NMC register 2018:  
4  
5 <https://www.nmc.org.uk/globalassets/sitedocuments/other->  
6  
7 [publications/nmc-big-picture-september-18.pdf](https://www.nmc.org.uk/globalassets/sitedocuments/other-publications/nmc-big-picture-september-18.pdf) accessed January 2019  
8  
9  
10  
11 18. Baltruks D, Callaghan P. [https://councilofdeans.org.uk/wp-](https://councilofdeans.org.uk/wp-content/uploads/2018/08/Nursing-midwifery-and-allied-health-clinical-academic-research-careers-in-the-UK.pdf)  
12  
13 [content/uploads/2018/08/Nursing-midwifery-and-allied-health-clinical-](https://councilofdeans.org.uk/wp-content/uploads/2018/08/Nursing-midwifery-and-allied-health-clinical-academic-research-careers-in-the-UK.pdf)  
14  
15 [academic-research-careers-in-the-UK.pdf](https://councilofdeans.org.uk/wp-content/uploads/2018/08/Nursing-midwifery-and-allied-health-clinical-academic-research-careers-in-the-UK.pdf) Accessed February 2019  
16  
17  
18  
19 19. [https://www.healthcareers.nhs.uk/career-planning/study-and-](https://www.healthcareers.nhs.uk/career-planning/study-and-Training/apprenticeships-traineeships-and-cadet-schemes)  
20  
21 [Training/apprenticeships-traineeships-and-cadet-schemes](https://www.healthcareers.nhs.uk/career-planning/study-and-Training/apprenticeships-traineeships-and-cadet-schemes)  
22  
23  
24 20. Association of UK University Hospitals (AUKUH) Clinical Academic  
25  
26 Roles Development Group  
27  
28 [https://www.bda.uk.com/professional/research/transforming\\_healthcare](https://www.bda.uk.com/professional/research/transforming_healthcare_through_clinical_academic_roles_in_nursing_midwifery_and_allied_health_professionals)  
29  
30 [through\\_clinical\\_academic\\_roles\\_in\\_nursing\\_midwifery\\_and\\_allied\\_health](https://www.bda.uk.com/professional/research/transforming_healthcare_through_clinical_academic_roles_in_nursing_midwifery_and_allied_health_professionals)  
31  
32 [\\_professionals](https://www.bda.uk.com/professional/research/transforming_healthcare_through_clinical_academic_roles_in_nursing_midwifery_and_allied_health_professionals) Accessed July 2017  
33  
34  
35  
36  
37 21. [https://mrc.ukri.org/skills-careers/studentships/studentship-](https://mrc.ukri.org/skills-careers/studentships/studentship-guidance/minimum-stipend-and-allowances/)  
38  
39 [guidance/minimum-stipend-and-allowances/](https://mrc.ukri.org/skills-careers/studentships/studentship-guidance/minimum-stipend-and-allowances/) Accessed February 2019  
40  
41  
42  
43 22. NHS Agenda for change [https://www.healthcareers.nhs.uk/working-](https://www.healthcareers.nhs.uk/working-health/working-nhs/nhs-pay-and-benefits/agenda-change-pay-rates)  
44  
45 [health/working-nhs/nhs-pay-and-benefits/agenda-change-pay-rates](https://www.healthcareers.nhs.uk/working-health/working-nhs/nhs-pay-and-benefits/agenda-change-pay-rates)  
46  
47  
48 Accessed January 2019  
49  
50  
51 23. NHS Health Education England and National Institute for Health  
52  
53 Research 2017; [https://www.nihr.ac.uk/funding-and-](https://www.nihr.ac.uk/funding-and-support/documents/ICA/TCC-ICA-GUIDE.pdf)  
54  
55 [support/documents/ICA/TCC-ICA-GUIDE.pdf](https://www.nihr.ac.uk/funding-and-support/documents/ICA/TCC-ICA-GUIDE.pdf) accessed January 2019  
56  
57  
58  
59  
60

1  
2  
3 24. Davies SC, Walley T, Smye S, et al. The NIHR at 10: transforming  
4 clinical research. *Clinical Medicine* 2015;16(6):501-210.

5  
6  
7  
8 <http://www.clinmed.rcpjournals.org/content/16/6/501.full.pdf+html>  
9

10  
11 25. Bronfenbrenner U, 1979. *The ecology of human development*.  
12 Harvard University press.  
13

14  
15  
16 26. NIHR [https://www.nihr.ac.uk/news/partners-announce-latest-](https://www.nihr.ac.uk/news/partners-announce-latest-progress-with-cqc-aimed-at-ensuring-research-is-a-priority-for-quality-patient-care/8496ere)  
17  
18  
19  
20  
21  
22  
23  
24  
25  
26  
27  
28  
29  
30  
31  
32  
33  
34  
35  
36  
37  
38  
39  
40  
41  
42  
43  
44  
45  
46  
47  
48  
49  
50  
51  
52  
53  
54  
55  
56  
57  
58  
59  
60

26. <https://www.nursingworld.org/organizational-programs/magnet/>  
accessed January 2019

28. NHS [https://www.longtermplan.nhs.uk/wp-](https://www.longtermplan.nhs.uk/wp-content/uploads/2019/01/nhs-long-term-plan.pdf)  
content/uploads/2019/01/nhs-long-term-plan.pdf accessed March 2019

29. Royal College of Nursing 'Nursing through time'

[https://www.rcn.org.uk/-/media/royal-college-of-](https://www.rcn.org.uk/-/media/royal-college-of-nursing/documents/publications/2017/april/pub-005736.pdf)  
nursing/documents/publications/2017/april/pub-005736.pdf

30. Springett K, Norton C, Louth S, et al. (2014) Eliminate tensions to  
make research work on the front line. Available

at: [https://www.hsj.co.uk/leadership/eliminate-tensions-to-make-](https://www.hsj.co.uk/leadership/eliminate-tensions-to-make-research-work-on-the-front-line/5075013.article?blocktitle=Resource-Centre&contentID=8630#.VDgAEfldVI5)  
research-work-on-the-front-line/5075013.article?blocktitle=Resource-  
Centre&contentID=8630#.VDgAEfldVI5 (accessed July 2017).



**Figures:**

- Figure 1. How participants described their gender
- Figure 2. Age groups of survey respondents
- Figure 3. Alternative sources of PhD funding
- Figure 4. Ecological model

**Author Contributions:** All authors (DT, ER and LB) were involved with the study design and data analysis. DT collected the data and drafted the manuscript as lead author. ER and LB contributed comments and edits to the manuscript. Final approval was given by all authors.

**Funding:** This work was supported by the National Institute for Health Research (NIHR) Collaboration for Leadership in Applied Health Research and Care East Midlands (CLAHRC EM), grant number S-CLA-0113-10014. The views expressed are those of the authors and not necessarily those of the NIHR or the Department of Health and Social Care.

**Competing interests:** All authors have completed the ICMJE uniform disclosure form at [www.icmje.org/coi\\_disclosure.pdf](http://www.icmje.org/coi_disclosure.pdf) and declare: all authors had financial support from the National Institute for Health Research (NIHR) Collaboration for Leadership in Applied Health Research and Care East Midlands (CLAHRC EM) for the submitted work; no financial relationships with any organisations that might have an interest in the submitted work in the previous three years; no other relationships or activities that could appear to have influenced the submitted work.

1  
2  
3 **Patient and public involvement:** We did not involve patients or the  
4  
5 public in our work.  
6  
7

8 **Data sharing statement:** Raw transcripts are held by the authors who  
9  
10 will consider requests for further information.  
11  
12  
13  
14  
15  
16  
17  
18  
19  
20  
21  
22  
23  
24  
25  
26  
27  
28  
29  
30  
31  
32  
33  
34  
35  
36  
37  
38  
39  
40  
41  
42  
43  
44  
45  
46  
47  
48  
49  
50  
51  
52  
53  
54  
55  
56  
57  
58  
59  
60

For peer review only

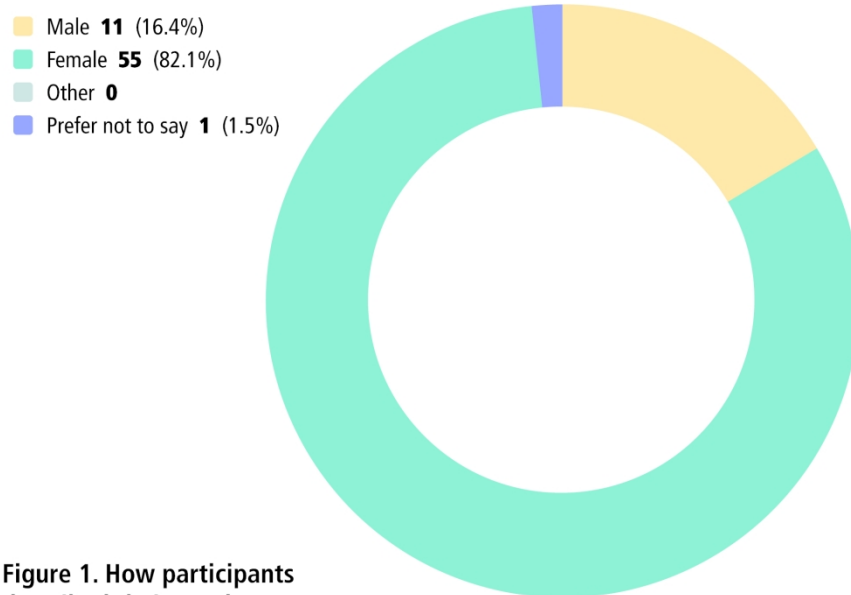

**Figure 1. How participants described their gender**

Figure 1. How participants described their gender

1  
2  
3  
4  
5  
6  
7  
8  
9  
10  
11  
12  
13  
14  
15  
16  
17  
18  
19  
20  
21  
22  
23  
24  
25  
26  
27  
28  
29  
30  
31  
32  
33  
34  
35  
36  
37  
38  
39  
40  
41  
42  
43  
44  
45  
46  
47  
48  
49  
50  
51  
52  
53  
54  
55  
56  
57  
58  
59  
60

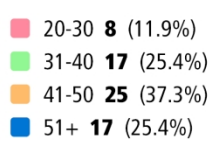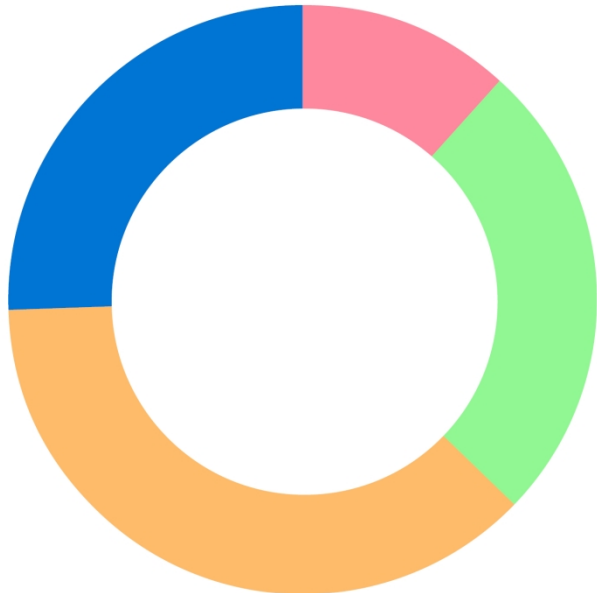

**Figure 2. Survey respondents' age groups**

Figure 2. Survey respondents' age groups

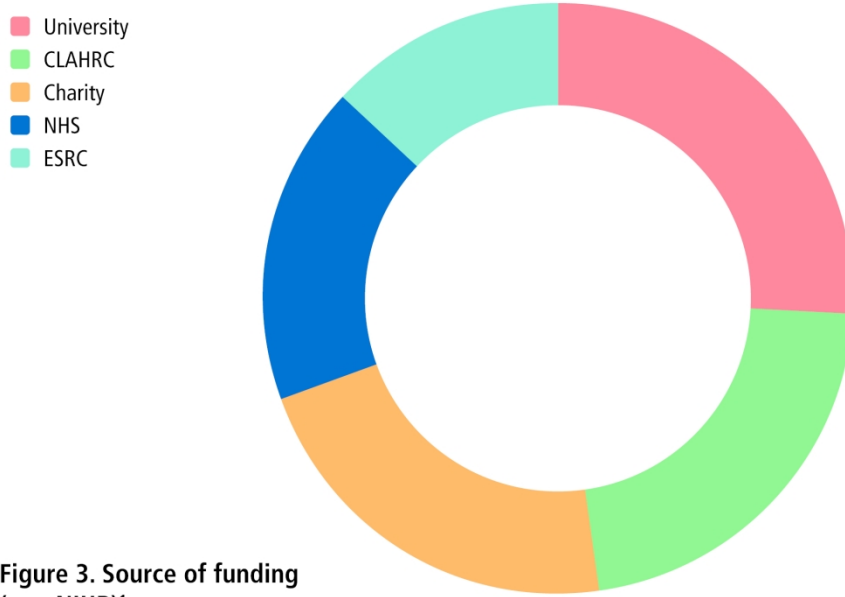

**Figure 3. Source of funding (non NIHR)<sup>1</sup>**

Figure 3. Non-NIHR PhD funding

1  
2  
3  
4  
5  
6  
7  
8  
9  
10  
11  
12  
13  
14  
15  
16  
17  
18  
19  
20  
21  
22  
23  
24  
25  
26  
27  
28  
29  
30  
31  
32  
33  
34  
35  
36  
37  
38  
39  
40  
41  
42  
43  
44  
45  
46  
47  
48  
49  
50  
51  
52  
53  
54  
55  
56  
57  
58  
59  
60

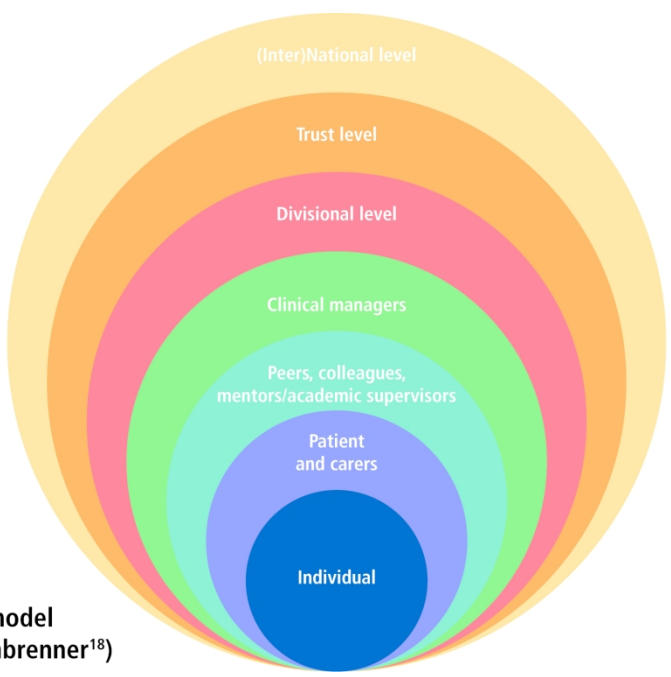

Figure 4. Ecological model (adapted from Brofenbrenner<sup>18</sup>)

Figure 4. Ecological model

## Standards for Reporting Qualitative Research (SRQR)

O'Brien B.C., Harris, I.B., Beckman, T.J., Reed, D.A., & Cook, D.A. (2014). Standards for reporting qualitative research: a synthesis of recommendations. *Academic Medicine*, 89(9), 1245-1251.

| No. | Topic                                       | Item                                                                                                                                                                                                                                                                                                                                     | Page |
|-----|---------------------------------------------|------------------------------------------------------------------------------------------------------------------------------------------------------------------------------------------------------------------------------------------------------------------------------------------------------------------------------------------|------|
|     | <b>Title and abstract</b>                   |                                                                                                                                                                                                                                                                                                                                          |      |
| S1  | Title                                       | Concise description of the nature and topic of the study identifying the study as qualitative or indicating the approach (e.g., ethnography, grounded theory) or data collection methods (e.g., interview, focus group) is recommended                                                                                                   | 1    |
| S2  | Abstract                                    | Summary of key elements of the study using the abstract format of the intended publication; typically includes objective, methods, results, and conclusions                                                                                                                                                                              | 2    |
|     | <b>Introduction</b>                         |                                                                                                                                                                                                                                                                                                                                          |      |
| S3  | Problem formulation                         | Description and significance of the problem/phenomenon studied; review of relevant theory and empirical work; problem statement                                                                                                                                                                                                          | 4    |
| S4  | Purpose or research question                | Purpose of the study and specific objectives or questions                                                                                                                                                                                                                                                                                | 5    |
|     | <b>Methods</b>                              |                                                                                                                                                                                                                                                                                                                                          |      |
| S5  | Qualitative approach and research paradigm  | Qualitative approach (e.g., ethnography, grounded theory, case study, phenomenology, narrative research) and guiding theory if appropriate; identifying the research paradigm (e.g., positivist, constructivist/interpretivist) is also recommended                                                                                      | 5    |
| S6  | Researcher characteristics and reflexivity  | Researchers' characteristics that may influence the research, including personal attributes, qualifications/experience, relationship with participants, assumptions, or presuppositions; potential or actual interaction between researchers' characteristics and the research questions, approach, methods, results, or transferability | 6    |
| S7  | Context                                     | Setting/site and salient contextual factors; rationale <sup>a</sup>                                                                                                                                                                                                                                                                      | 6    |
| S8  | Sampling strategy                           | How and why research participants, documents, or events were selected; criteria for deciding when no further sampling was necessary (e.g., sampling saturation); rationale <sup>a</sup>                                                                                                                                                  | 6    |
| S9  | Ethical issues pertaining to human subjects | Documentation of approval by an appropriate ethics review board and participant consent, or explanation for lack thereof; other confidentiality and data security issues                                                                                                                                                                 | 7    |
| S10 | Data collection methods                     | Types of data collected; details of data collection procedures including (as appropriate) start and stop dates of data collection and analysis, iterative process, triangulation of sources/methods, and modification of procedures in response to evolving study findings; rationale <sup>a</sup>                                       | 7    |
| S11 | Data collection                             | Description of instruments (e.g., interview guides, questionnaires)                                                                                                                                                                                                                                                                      | 7-8  |

|    |                                                                                                  |                                                                                                                                                                                                                                                                                                       |       |
|----|--------------------------------------------------------------------------------------------------|-------------------------------------------------------------------------------------------------------------------------------------------------------------------------------------------------------------------------------------------------------------------------------------------------------|-------|
|    | instruments and technologies                                                                     | and devices (e.g., audio recorders) used for data collection; if/how the instrument(s) changed over the course of the study                                                                                                                                                                           |       |
| 1  | S12 Units of study                                                                               | Number and relevant characteristics of participants, documents, or events included in the study; level of participation (could be reported in results)                                                                                                                                                | 8     |
| 2  |                                                                                                  |                                                                                                                                                                                                                                                                                                       |       |
| 3  | S13 Data processing                                                                              | Methods for processing data prior to and during analysis, including transcription, data entry, data management and security, verification of data integrity, data coding, and anonymization/deidentification of excerpts                                                                              | 9     |
| 4  |                                                                                                  |                                                                                                                                                                                                                                                                                                       |       |
| 5  | S14 Data analysis                                                                                | Process by which inferences, themes, etc., were identified and developed, including researchers involved in data analysis; usually references a specific paradigm or approach; rationale <sup>a</sup>                                                                                                 | 9     |
| 6  |                                                                                                  |                                                                                                                                                                                                                                                                                                       |       |
| 7  | S15 Techniques to enhance trustworthiness                                                        | Techniques to enhance trustworthiness and credibility of data analysis (e.g., member checking, audit trail, triangulation); rationale <sup>a</sup>                                                                                                                                                    | 10    |
| 8  |                                                                                                  |                                                                                                                                                                                                                                                                                                       |       |
| 9  |                                                                                                  |                                                                                                                                                                                                                                                                                                       |       |
| 10 |                                                                                                  |                                                                                                                                                                                                                                                                                                       |       |
| 11 |                                                                                                  |                                                                                                                                                                                                                                                                                                       |       |
| 12 |                                                                                                  |                                                                                                                                                                                                                                                                                                       |       |
| 13 |                                                                                                  |                                                                                                                                                                                                                                                                                                       |       |
| 14 |                                                                                                  |                                                                                                                                                                                                                                                                                                       |       |
| 15 |                                                                                                  |                                                                                                                                                                                                                                                                                                       |       |
| 16 | <b>Results/Findings</b>                                                                          |                                                                                                                                                                                                                                                                                                       |       |
| 17 |                                                                                                  |                                                                                                                                                                                                                                                                                                       |       |
| 18 | S16 Synthesis and interpretation                                                                 | Main findings (e.g., interpretations, inferences, and themes); might include development of a theory or model, or integration with prior research or theory                                                                                                                                           | 10-24 |
| 19 |                                                                                                  |                                                                                                                                                                                                                                                                                                       |       |
| 20 | S17 Links to empirical data                                                                      | Evidence (e.g., quotes, field notes, text excerpts, photographs) to substantiate analytic findings                                                                                                                                                                                                    | 10-24 |
| 21 |                                                                                                  |                                                                                                                                                                                                                                                                                                       |       |
| 22 |                                                                                                  |                                                                                                                                                                                                                                                                                                       |       |
| 23 |                                                                                                  |                                                                                                                                                                                                                                                                                                       |       |
| 24 |                                                                                                  |                                                                                                                                                                                                                                                                                                       |       |
| 25 | <b>Discussion</b>                                                                                |                                                                                                                                                                                                                                                                                                       |       |
| 26 |                                                                                                  |                                                                                                                                                                                                                                                                                                       |       |
| 27 | S18 Integration with prior work, implications, transferability, and contribution(s) to the field | Short summary of main findings; explanation of how findings and conclusions connect to, support, elaborate on, or challenge conclusions of earlier scholarship; discussion of scope of application/generalizability; identification of unique contribution(s) to scholarship in a discipline or field | 25-28 |
| 28 |                                                                                                  |                                                                                                                                                                                                                                                                                                       |       |
| 29 |                                                                                                  |                                                                                                                                                                                                                                                                                                       |       |
| 30 |                                                                                                  |                                                                                                                                                                                                                                                                                                       |       |
| 31 |                                                                                                  |                                                                                                                                                                                                                                                                                                       |       |
| 32 | S19 Limitations                                                                                  | Trustworthiness and limitations of findings                                                                                                                                                                                                                                                           | 28    |
| 33 |                                                                                                  |                                                                                                                                                                                                                                                                                                       |       |
| 34 |                                                                                                  |                                                                                                                                                                                                                                                                                                       |       |
| 35 |                                                                                                  |                                                                                                                                                                                                                                                                                                       |       |
| 36 | <b>Other</b>                                                                                     |                                                                                                                                                                                                                                                                                                       |       |
| 37 |                                                                                                  |                                                                                                                                                                                                                                                                                                       |       |
| 38 | S20 Conflicts of interest                                                                        | Potential sources of influence or perceived influence on study conduct and conclusions; how these were managed                                                                                                                                                                                        | 34    |
| 39 |                                                                                                  |                                                                                                                                                                                                                                                                                                       |       |
| 40 | S21 Funding                                                                                      | Sources of funding and other support; role of funders in data collection, interpretation, and reporting                                                                                                                                                                                               | 34    |
| 41 |                                                                                                  |                                                                                                                                                                                                                                                                                                       |       |
| 42 |                                                                                                  |                                                                                                                                                                                                                                                                                                       |       |

<sup>a</sup>The rationale should briefly discuss the justification for choosing that theory, approach, method, or technique rather than other options available, the assumptions and limitations implicit in those choices, and how those choices influence study conclusions and transferability. As appropriate, the rationale for several items might be discussed together.



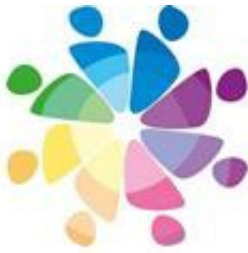

East Midlands  
Clinical-Academic  
Practitioner Network

# Clinical Academic Survey

---

## Clinical academic survey

The East Midlands Clinical Academic Steering Group are hoping to demonstrate the impact of clinical academic training programmes so that future cohorts are able to benefit from the same opportunities that you have had.

With this in mind, we would be extremely grateful if you could take a few minutes to complete this questionnaire in Part 1 and also, if possible, to answer the additional questions in Part 2 (approx. 10 minutes). Part 3 is for people who are currently on a clinical academic training programme.

We appreciate that some work on this has already been undertaken by others, so if you have already taken part in a similar survey, we do not expect you to repeat the information.

**Please be assured that all of your responses will be treated confidentially. Also, any quotes from the data that we may use when disseminating the results, will be anonymised.**

All returned responses will be entered into a **prize draw** for a chance to **win a book of your choice up to a value of £50**. Please return the form by **20th April, 2018** and provide your name and email address here so that we can contact the prize winner.

1  
2  
3  
4  
5  
6  
7  
8  
9  
10  
11  
12  
13  
14  
15  
16  
17  
18  
19  
20  
21  
22  
23  
24  
25  
26  
27  
28  
29  
30  
31  
32  
33  
34  
35  
36  
37  
38  
39  
40  
41  
42  
43  
44  
45  
46  
47  
48  
49  
50  
51  
52  
53  
54  
55  
56  
57  
58  
59  
60

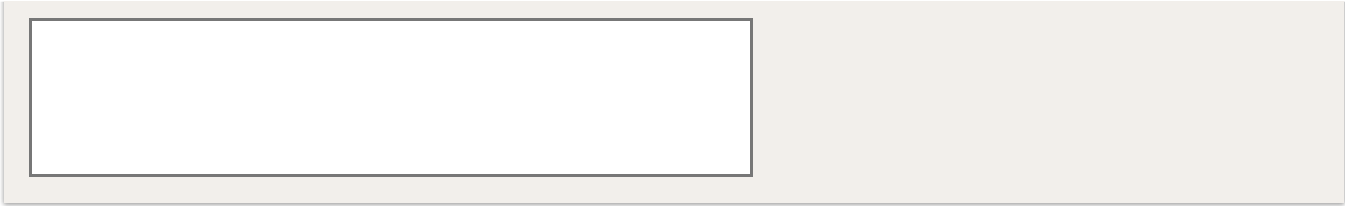

***Thank you very much in advance for your help. Good luck in the prize draw!***

For peer review only

# Part 1

Age group *Optional*

- 20-30
- 31-40
- 41-50
- 51+

How would you describe your gender?

- Male
- Female
- Other
- Prefer not to say

Current employment

- NHS
- University
- Both NHS and University
- Other employer

Please give the name(s) of your employer(s)

Please give your job title(s) and professional role (e.g assistant professor and nurse)

1  
2  
3  
4  
5  
6  
7  
8  
9  
10  
11  
12  
13  
14  
15  
16  
17  
18  
19  
20  
21  
22  
23  
24  
25  
26  
27  
28  
29  
30  
31  
32  
33  
34  
35  
36  
37  
38  
39  
40  
41  
42  
43  
44  
45  
46  
47  
48  
49  
50  
51  
52  
53  
54  
55  
56  
57  
58  
59  
60

Are you employed:

Full-time

Part-time

At what level? (e.g. AFC Band or HEI scale)

Review only

## Training programmes

Which of these clinical academic training programmes have you undertaken/are you undertaking? Please tick all that apply:

- Bronze fellowship
- Silver fellowship
- MARM
- NIHR funded MARM
- Masters in Clinical Research Studentship
- Other Masters programme
- Professional Doctorate
- NIHR funded PhD
- PhD not funded by NIHR
- Gold fellowship
- Other

Where did you undertake each training? (please list details for all courses that you have done) \* *Required*

How was your PhD funded?

If you selected Other, please specify: **Was it clinical academic training or another type of training?** Please provide details such as training provider; course completed/predicted completion date; qualification:

1  
2  
3  
4  
5  
6  
7  
8  
9  
10  
11  
12  
13  
14  
15  
16  
17  
18  
19  
20  
21  
22  
23  
24  
25  
26  
27  
28  
29  
30  
31  
32  
33  
34  
35  
36  
37  
38  
39  
40  
41  
42  
43  
44  
45  
46  
47  
48  
49  
50  
51  
52  
53  
54  
55  
56  
57  
58  
59  
60

Which is the last training that you have done and when did it/will it finish? (month/year)

What were your reasons for stopping training at that point?

**For current PhD students:** When did you start your PhD? (month/year)

Is it NIHR funded?

Yes

No

If not, how is your PhD funded?

Where are you on the PhD journey?

- Year 1
- Year 2
- Year 3
- Year 4
- Year 5
- Year 6
- Thesis pending

What is your anticipated end date? (month/year)

**Please give brief details below of what you have done as a consequence of your funding/training:**

Have you changed your employment in any way? For example, new roles; grades etc?

Please describe ways in which your training has had an impact or changed your clinical practice:

Have you disseminated your research:

- Locally
- Nationally
- Both

Please provide details of how you have disseminated your research (e.g. publications, conference presentations/posters). If possible, please provide links or cut and paste details.



Have you had any successful grant applications or other collaborations?

- 1  
2  
3  
4  
5  
6  
7  
8
- Yes
  - No

9  
10  
11  
12

If so, please provide details (e.g. the funding body, research project, grant reference (if any), and whether you were the lead or co-applicant)

13  
14  
15  
16  
17  
18  
19

20  
21  
22  
23  
24  
25  
26  
27  
28  
29

**Thank you for the answers you have provided so far. We would be grateful if you could also take a few minutes to complete some or all of the questions in part 2. Current clinical academics are also invited to complete part 3. Otherwise, please skip to the finish at the end of part 3 to submit your survey.**

- 30  
31  
32  
33  
34  
35  
36  
37  
38  
39  
40  
41  
42  
43  
44  
45  
46  
47  
48  
49  
50  
51  
52  
53  
54  
55  
56  
57  
58  
59  
60
- Proceed to part 2
  - Skip to part 3

## Part 2

In this part of the questionnaire, we want to find out what the term 'clinical academic' means to you, and how the clinical academic training you have received has influenced your career.

The description 'clinical academic' is varied. We want to try to find a way to best explain what the role is. Please explain what you understand by the title 'clinical academic':

Do you consider yourself to be a clinical academic?

Yes

No

If so why? (for example, do you have funded research and clinical sessions?)

How has the clinical academic training you have received helped you in your career and/or clinical practice?

1  
2  
3  
4  
5  
6  
7  
8  
9  
10  
11  
12  
13  
14  
15  
16  
17  
18  
19  
20  
21  
22  
23  
24  
25  
26  
27  
28  
29  
30  
31  
32  
33  
34  
35  
36  
37  
38  
39  
40  
41  
42  
43  
44  
45  
46  
47  
48  
49  
50  
51  
52  
53  
54  
55  
56  
57  
58  
59  
60

How did you overcome any challenges in achieving success and/or progressing to the next level in your clinical academic career?

What types of support did you find most helpful during your clinical academic training?

Have your goals changed during your training?

- Yes
- No

If so, please explain how and why your goals have changed:

1 **Are there any resources that you found beneficial in developing your clinical**  
2 **academic role which you would be happy to share for the benefit of others?**

3  
4 These might include, for example, a job description or a report which was helpful in  
5 gaining the support of your managers for your training.  
6  
7

8  
9  
10  
11 If you have any resources that you think might be useful, please send them as an attachment to  
12 the following email: [diane.trusson@nottingham.ac.uk](mailto:diane.trusson@nottingham.ac.uk) . Alternatively, please give link(s) to  
13 electronic resources here:  
14

15  
16  
17  
18  
19  
20  
21  
22



23  
24  
25  
26  
27 What advice would you give to people who are considering undertaking training and  
28 embarking on a clinical academic career?  
29

30  
31  
32  
33  
34  
35  
36  
37



38  
39  
40  
41  
42 Is there anything else that you want to add?  
43

44  
45  
46  
47  
48  
49  
50



51  
52  
53 **If you are currently on a clinical academic training programme (e.g.**  
54 **MRes/MARM/Bronze or Silver scholar/PhD/Post-doc), please complete the**  
55 **questions in Part 3. Otherwise, please press 'next' to finish on the final page.**  
56  
57

1  
2  
3  
4  
5  
6  
7  
8  
9  
10  
11  
12  
13  
14  
15  
16  
17  
18  
19  
20  
21  
22  
23  
24  
25  
26  
27  
28  
29  
30  
31  
32  
33  
34  
35  
36  
37  
38  
39  
40  
41  
42  
43  
44  
45  
46  
47  
48  
49  
50  
51  
52  
53  
54  
55  
56  
57  
58  
59  
60

### Part 3. If you are currently on a clinical academic training programme e.g. MRes/MARM/Bronze or Silver scholar/PhD/Post-doc

Would you be interested in taking part in a focus group to discuss your experiences?

- Yes  
 No

If so, please provide your contact details here:

We would also like to develop some case studies to demonstrate the impact that clinical academic training can have both in relation to your career and your clinical practice. Would you be willing to be interviewed about your experiences?

- Yes  
 No

If so, please provide your contact details here:

Thank you for taking the time to complete this survey, your responses are very important to us.

---

For peer review only

1  
2  
3  
4  
5  
6  
7  
8  
9  
10  
11  
12  
13  
14  
15  
16  
17  
18  
19  
20  
21  
22  
23  
24  
25  
26  
27  
28  
29  
30  
31  
32  
33  
34  
35  
36  
37  
38  
39  
40  
41  
42  
43  
44  
45  
46  
47  
48  
49  
50  
51  
52  
53  
54  
55  
56  
57  
58  
59  
60

1. Can you tell me a bit about your experience of being a clinical academic?
2. What was/is your motivation for doing clinical academic training?
3. In what ways do you think your training has helped you to develop as a clinician?
4. What are you doing differently?
5. How have you brought your research into your clinical practice – what have you done because of your training?
6. Can you give me examples of ways that your clinical practice has changed as a result of your training?
7. How have your changes been beneficial? Do you have any evidence of benefits to practice?
8. Research project impact
9. Influence on the practice of others?
10. Is there anything else you want to add?
